# Supplementary material
Source: ML conference proceedings conference paper supplement (https://openreview.net/forum?id=lGUzCAdYoq)
Supplement: supplementary_material [file simulation_inference_appendix.pdf › simulation_inference/simulation_inference_appendix.pdf]

---

# Simulation-Based Inference for Adaptive Experiments

---

Anonymous Author(s)

Affiliation

Address

email

## Abstract

1 Multi-arm bandit experimental designs are increasingly being adopted over standard  
2 randomized trials due to their potential to improve outcomes for study participants,  
3 enable faster identification of the best-performing options, and/or enhance the  
4 precision of estimating key parameters. Current approaches for inference after  
5 adaptive sampling either rely on asymptotic normality under restricted experiment  
6 designs or underpowered martingale concentration inequalities that lead to weak  
7 power in practice. To bypass these limitations, we propose a simulation-based  
8 approach for conducting hypothesis tests and constructing confidence intervals for  
9 arm specific means and their differences. Our simulation-based approach uses posi-  
10 tively biased nuisances to generate additional trajectories of the experiment, which  
11 we call *simulation with optimism*. Using these simulations, we characterize the  
12 distribution potentially non-normal sample mean test statistic to conduct inference.  
13 We provide guarantees for (i) asymptotic type I error control, (ii) convergence of  
14 our confidence intervals, and (iii) asymptotic strong consistency of our estimator  
15 over a wide variety of common bandit designs. Our empirical results show that our  
16 approach achieves the desired coverage while reducing confidence interval widths  
17 by up to 50%, with drastic improvements for arms not targeted by the design.

## 18 1 Introduction

19 In recent years, adaptive experimental designs have gained increasing popularity over the classic  
20 randomized controlled trial. Bandit algorithms, where treatment assignment probabilities are updated  
21 sequentially and simultaneously with data collection, are increasingly used for objectives such as  
22 welfare maximization during experimentation [1, 17], quickly identifying well-performing option(s)  
23 [8, 10], and maximizing power against particular hypotheses [14, 22, 34]. Compared to classic fixed  
24 designs, modern approaches offer the promise of flexible, efficient experimentation by leveraging  
25 information collected *during* the experiment.

26 However, once the experiment is over, researchers are still interested in using adaptively collected  
27 data to conduct inference on a variety of different quantities, including those not targeted by the  
28 design. For example, while an adaptive design may sample the best-performing option at a higher rate,  
29 experimenters may still be interested in conducting inference on all offered options in the experiment.  
30 Policymakers may be interested in whether the best-performing option outperforms other alternatives  
31 with a certain level of statistical significance to assess the credibility of their conclusions. Such goals  
32 necessitate after-study inference. However, while adaptive experiments offer numerous benefits, they  
33 pose challenges for after-study inference [2, 19]. Unlike classic randomized controlled trials, standard  
34 hypothesis tests and confidence intervals are not guaranteed to provide their nominal error control  
35 (e.g., contain the true target of inference with a pre-specified desired error probability).

36 Existing works addressing this issue primarily rely on two distinct approaches. Some works [4,  
37 11] propose reweighing approaches in order to enforce asymptotic normality and use Wald-style  
38 confidence intervals. These approaches, however, restrict the class of experiment designs. Sampling

schemes must have nonzero probability of selecting an option at each timestep of the trial, which excludes popular designs such as explore-then commit (ETC) and upper-confidence-bound style (UCB) algorithms. As an alternative to asymptotic normality, anytime valid inference approaches [5, 7, 8, 21, 29, 30] ensure correct error control across all adaptive designs. These approaches, however, are often underpowered in many use cases due to protecting for all possible sampling schemes, rather than the exact design used for data collection.

**Contributions.** We provide a novel asymptotic inference approach for adaptive experimental designs. Our approach relies on a simulation procedure that adds positive bias towards estimated nuisances, which we call *simulation with optimism*. Our procedure conducts hypothesis tests for values of arm means and their differences using these simulated distributions, providing natural confidence intervals and point estimates. We prove that our approach maintains desired type I error control over a wide class of commonly used designs, *including designs which violate the conditional positivity assumption* necessary for asymptotic approaches. Crucially, we show the benefits of our approach on both synthetic data and real-world data collected adaptively from the Amazon MTurk platform. Across experiments, our method demonstrate improvements in interval widths and estimation error by up to 50%, with dramatic improvements for parameters not specifically targeted by the design.

**Outline.** In the remainder of this section, we provide a brief overview of inference approaches for data collected under adaptive designs. In Section 2, we introduce the notation and set-up for our problem. In Section 3, we introduce our algorithm. We provide intuition for our algorithm using a simple ETC example, and show our approach protects type I error under multiple designs commonly used in practice. In Section 4, we test our approach on both synthetic setups and real-world data collected from a political science survey experiment, showing that our approach achieves tighter confidence intervals while preserving Type I error control.

## 1.1 Related Works

**Reweighting for Asymptotic Normality.** Many existing works aim to provide valid inference and hypotheses tests by reweighting existing estimators [6] for a fixed sampling scheme and stopping time. These reweighting schemes [4, 11, 32] aims to stabilize variances and recover the conditions of a martingale central limit (MCLT) theorem [12], enabling standard Wald-style confidence intervals based on asymptotic normality. Popular approaches [11] propose weighing schemes that heuristically aim to reduce variance, under variance convergence conditions sufficient for ensuring asymptotic normality. These approaches rely on strict rates of exploration for asymptotic normality to hold. Specifically, at each timestep, the design must have nonzero probability of selecting a given arm, conditional on the observed history. This is violated even in the simplest of adaptive sampling schemes, such as ETC and UCB. To provide inferential guarantees without such restrictions, other works have proposed inferential tools that satisfy *anytime validity*, which provides valid inference across all potential experiment designs.

**Anytime Valid Inference.** Anytime valid inference [13, 21] sidesteps asymptotic normality altogether in order to provide inferential guarantees under any experiment design. Nonasymptotic anytime valid inference rely on martingale concentration inequalities [27] to obtain their guarantees. However, these approaches require known bounds on the moment generating function of the underlying distribution [13]. To improve power and sidestep these limitations, other works have provided anytime valid approaches with *asymptotic guarantees* [5, 29], which rely on invariance principles [18] to obtain their approximate guarantees. While these approaches provide better power empirically than exact approaches, asymptotic anytime valid approaches are often still conservative due to protecting for *all* potential designs after a burn-in period, rather than the experiment design used in the study.

**Existing Simulation-Based Approaches.** Instead of enforcing asymptotic normality or providing anytime valid guarantees, our approach leverages a generative simulation procedure to approximate the distribution of our test statistic. Due to each observation depending on the entire history, bootstrap and block bootstrap approaches [9, 25] are not directly applicable to adaptively collected data. Previous works in this setting focus specifically on tractable experiment designs, such as play-the-winner [31] sampling algorithm, in order to obtain analytical limiting distributions for inference. Other works [23] leverage a bootstrap procedure using an estimate of the data-generating distribution in the case of Bernoulli data. Our approach most closely aligns with the latter approach. However, our method can (i) handle more than two arms, (ii) accommodates nonparametric arm distributions, and (iii) applies to a wide class of adaptive experiment designs commonly used in practice.

## 94 2 Notation and Set-up

95 Throughout this work, we denote random vectors and random variables as  $\mathbf{X}$  and  $X$  in uppercase.  
 96 We denote realizations of random vectors and random variables as  $\mathbf{x}$  and  $x$  in lowercase. We use the  
 97 set  $[N]$  to denote the set of integers  $\{1, \dots, N\}$ , and use the subscripts  $X_t$  as the time index for  $t \in \mathbb{N}$ .  
 98 We use  $\theta^*, \eta^*$  to denote the true underlying value of unknown parameters  $\theta, \eta$  in the experiment.

99 We aim to analyze data sequences generated by interactions between an environment and an experi-  
 100 menter in the multi-armed bandit setting. We assume there exists  $K$  treatments (or arms), each with  
 101 a distribution  $P_a$  corresponding to each arm  $a \in [K] = \{1, \dots, K\}$ . Over successive rounds  $t \in \mathbb{N}$ ,  
 102 an action  $A_t$  from an action set  $[K]$  is selected, then generates an outcome  $X_t \in \mathbb{R}$  according to  
 103 a distribution  $P_{A_t}$ . The action  $A_t$  is selected based on a known policy  $\pi_t : H_{t-1} \rightarrow \Delta^K$ , where  
 104  $H_{t-1} = (A_i, X_i)_{i=1}^{t-1}$  denotes all observations up to time  $t-1$  and  $\Delta^K$  denotes the probability simplex  
 105 over  $[K]$ . The experiment terminates at time  $T$ , resulting in an observed sequence  $H_T = (A_i, X_i)_{i=1}^T$ .

106 We denote the number of pulls and the sample mean of arm  $a$  up to time  $t \in [T]$  as  $N_t(a) =$   
 107  $\sum_{i=1}^t \mathbf{1}[A_i = a]$  and  $\hat{\mu}_t(a) = \frac{\sum_{i=1}^t \mathbf{1}[A_i = a] X_i}{N_t(a)}$  respectively. We assume that the sampling scheme  
 108  $\pi = \{\pi_t\}_{t \in T}$  is known, as is common in practice for adaptive experiments. Furthermore, we put the  
 109 following assumptions on our adaptive design  $\{\pi_t\}_{t \in [T]}$  and arm distributions  $\{P_a\}_{a \in [K]}$ .

110 **Assumption 1** (Infinite Sampling). *For each  $a \in [K]$ ,  $\lim_{T \rightarrow \infty} N_T(a)$  diverges to infinity almost*  
 111 *surely for any set of arm distributions  $\{P_a\}_{a \in [K]}$ .*

112 This assumption is generally satisfied in practice, even in designs that aggressively aim to maximize  
 113 the average outcome. Regret-optimal sampling schemes (i.e., sampling schemes that achieve the  
 114 largest possible expected value within the trial duration) satisfy Assumption 1 by sampling all arms  
 115 at least on the order of  $\log(T)$  [16]. Assumption 1 does not imply conditions such as conditional  
 116 positivity, where the probability of selecting an arm  $a \in [K]$  must remain above zero for all  $t \in [T]$ .

### 117 2.1 Problem Statement

118 In this work, we focus on conducting inference on arm-specific means and their pairwise differences.  
 119 We denote  $\mu_a = \mathbb{E}_{P_a}[X]$  as the mean of arm  $a$  for each arm  $a \in [K]$ , and use  $\tau_{a,a'} = \mu_a - \mu_{a'}$  to  
 120 denote the difference in means between arms  $a$  and  $a'$ . We use  $\theta$  to denote our target parameter (i.e.,  
 121 an arm-specific mean or their pairwise difference). Our goal is to conduct pointwise hypothesis tests  
 122 for values of  $\theta$  and construct confidence intervals for  $\theta^*$  that provide asymptotic type I error control at  
 123 level  $\alpha$ . We formally define asymptotic error control for our hypothesis tests and confidence intervals,  
 124 starting with hypothesis tests in Definition 1.

125 **Definition 1** (Type I Error Control). *Let  $\xi : (\theta_0, \alpha, H_T) \rightarrow \{0, 1\}$  be a test for null hypothesis*  
 126  *$\theta = \theta_0$  with nominal Type I error probability  $\alpha$ . Let  $\xi(\theta_0, \alpha, H_T) = 1$  denote rejection of the null*  
 127  *$\theta = \theta_0$ . We say that the test  $\xi(\theta_0, \alpha, H_T)$  has Type I error control if the probability of rejecting  $\theta_0$*   
 128 *when  $\theta^* = \theta_0$  is at most  $\alpha$  as  $T \rightarrow \infty$ , i.e.*

$$\limsup_{T \rightarrow \infty} \mathbb{P}_{\theta^* = \theta_0} (\xi(\theta_0, \alpha, H_T) = 1) \leq \alpha. \quad (1)$$

129 Similarly, we define error control for confidence intervals with respect to the probability that a  
 130 constructed interval does not contain  $\theta^*$ , the ground truth value of our target parameter of interest  $\theta$ .

131 **Definition 2** (Coverage of Confidence Set). *Let  $C(\alpha, H_T)$  be a mapping from a prespecified  $\alpha$ -level*  
 132 *and the observed data  $H_T$  to an interval in  $\mathbb{R}$ . We say that the set  $C(\alpha, H_T)$  has asymptotic coverage*  
 133  *$1 - \alpha$  if  $\theta^*$  is contained in the (random) confidence interval with at least probability  $1 - \alpha$ , i.e.*

$$\limsup_{T \rightarrow \infty} \mathbb{P} (\theta^* \notin C(\alpha, H_T)) \leq \alpha \quad (2)$$

134 A test with type I error control directly leads to a confidence interval for the true value of  $\theta$ . By  
 135 including all values of  $\theta$  not rejected by a test with type I error control, one obtains a confidence  
 136 set with the desired coverage level. In the following section, we provide our simulation-based test  
 137 that satisfies the asymptotic error control condition in Definition 1 for common adaptive designs. By  
 138 inverting this test, we construct asymptotically valid confidence intervals that satisfy Definition 2 and  
 139 heuristic point estimates for our parameter of interest.

---

**Algorithm 1** Trajectory Simulation

---

```
1: input: observed data  $H_T$ , sampling scheme  $\pi$ , point null value  $\theta_0$ .
2: Estimate nuisance parameters  $\hat{\eta} = [\hat{\mu}_2, \dots, \hat{\mu}_K, \hat{\sigma}_1^2, \dots, \hat{\sigma}_2^2]$ .
3: Set  $\hat{H}_0 = \{\emptyset\}$ , and set  $t = 0$ .
4: for  $t$  in  $[T]$  do
5:   Sample  $A_t$  according to the policy  $\pi_t : \hat{H}_{t-1} \rightarrow \Delta^{[K]}$ .
6:   Generate  $X_t$  according to the normal distribution  $N(\mathbf{1}[A_t \neq 1]\hat{\mu}_{A_t} + \mathbf{1}[A_t = 1]\theta_0, \hat{\sigma}_{A_t}^2)$ .
7:   Set  $\hat{H}_t = \hat{H}_{t-1} \cup (A_t, X_t)$ .
8: Return  $\hat{H}_T$ .
```

---

140 **Remark 1** (Why asymptotic control?). *One may ask why we seek asymptotic control, rather than*  
141 *control for any sample size  $T \in \mathbb{N}$ . We note that this is in line with standard approaches for*  
142 *statistical inference. Empirically well-powered approaches for inference with adaptively collected*  
143 *data [3, 5, 11] only offer asymptotic guarantees as in Definitions 1 and 2. Even in standard settings*  
144 *where observations are distributed independently, the most common mode of inference is the Wald*  
145 *confidence interval, which offers only asymptotic guarantees for type I error and coverage.*

### 146 3 Simulation Based Inference

147 To simplify exposition, we focus on arm-specific means as our target parameter, using  $\mu_1$ , the mean  
148 of arm 1, as our running example. We provide equivalent results for the difference-in-means target  
149 parameter in Appendix B. We first provide the pseudocode our simulation-based inference approach.  
150 We then discuss nuisance estimation, and introduce the principle of *simulation with optimism*. We  
151 demonstrate the importance of this principle with case study using a simple ETC design, and provide  
152 theoretical guarantees regarding type I error for designs used commonly in practice. Finally, we  
153 provide our confidence interval and point estimate that leverage our testing procedure. We show  
154 minimal convergence guarantees for both approaches, and discuss their practical considerations.

#### 155 3.1 Pseudocode for our Approach

156 Our approach for conducting tests and constructing confidence intervals is based on a generative  
157 procedure for producing simulated experiment trajectories under the null hypothesis  $\theta = \theta_0$ . While  
158 the null hypothesis specifies the value of the target parameter, we require arm distributions and means  
159 for all other arms in order to simulate trajectories, which we refer to as *nuisance* parameters. We  
160 provide a simulation procedure in Algorithm 1, which generates observations from each arm with  
161 Gaussian noise<sup>1</sup>. Under the Gaussian noise trajectory simulation, we set our nuisances  $\eta$  to be the  
162 means of all arms other than target arm 1, as well as the variances for all arms. Note that we do not  
163 assume that the true underlying arm distributions follow a normal distribution.

164 Given our trajectory simulation procedure, we provide our approach for point null hypothesis testing  
165 in Algorithm 2. Our procedure first computes the sample mean test statistic  $\rho(H_T) = \hat{\mu}_T(1)$  on  
166 the observed data  $H_T$ . We then generate  $B$  trajectories of our experiment using Algorithm 1 to  
167 approximate the distribution of the sample mean test statistic under the null  $\theta = \theta_0$ . We reject the  
168 point null  $\theta = \theta_0$  if the observed sample mean  $\rho(H_T)$  falls below (or above) the lower (or upper)  
169  $\alpha/2$  quantile of the simulated distribution, resembling a standard two-sided test. In Algorithm 2, we  
170 return our decision to reject/accept the null  $\theta = \theta_0$  and its corresponding  $p$ -value.

171 The choice of the sample mean test statistic  $\rho(H_T) = \hat{\mu}_T(1)$  is motivated by minimal power results  
172 for our test. Specifically, under Assumption 1, the sample mean test statistic guarantees that Algorithm  
173 2 rejects the nulls  $\theta_0 \neq \theta^*$  as the trial duration grow large. We formalize this in Lemma 1 below.

174 **Lemma 1** (Test of Power 1.). *Let  $\theta = \theta_0$  be the point null, and assume Assumption 1 holds.*  
175 *Furthermore, assume that for all  $a \in [K]$ , the variances of distribution  $P_a$  is finite. Then, if  $\theta_0 \neq \theta^*$ ,*  
176 *the probability that Algorithm 2 rejects  $\theta_0$  converges to 1 almost surely as  $T \rightarrow \infty$ .*

---

<sup>1</sup>In the setting of parametric arms (e.g., Bernoulli arms), where arm means specify each arm's distribution, the nuisance parameters  $\eta$  for target parameter  $\theta = \mu_1$  are just all other arm means  $\mu_{-1} = [\mu_2, \dots, \mu_K]$ .

---

**Algorithm 2** Point Null Testing via Resimulation
 

---

- 1: **input:** observed data  $H_T$ , sampling scheme  $\pi$ , type I error  $\alpha$ , sim. number  $B$ , null value  $\theta_0$ .
  - 2: Estimate nuisance parameters  $\hat{\eta}$ , and estimate observed test statistic  $\rho(H_T) = \frac{\sum_{t=1}^T \mathbf{1}[A_t=1]X_t}{\sum_{t=1}^T \mathbf{1}[A_t=1]}$ .
  - 3: **for**  $i$  in  $[1, B]$  **do**
  - 4:   Generate trajectory  $H_T^{(i)}$  by resimulating the experiment according to Algorithm 1.
  - 5:   Calculate the test statistic from the generated trajectory  $\hat{\rho}^{(i)} = \rho(H_T^{(i)})$ .
  - 6: Denote the CDF of the simulated distribution as  $\hat{F}(x) = \frac{1}{B} \sum_{i=1}^B \mathbf{1}[\hat{\rho}^{(i)} \leq x]$ . Calculate  $\hat{F}(\rho(H_T))$ , the CDF of simulated test statistic evaluated at the observed test statistic  $\rho(H_T)$ .
  - 7: **Return**  $\left(1 - \mathbf{1}\left[\alpha/2 \leq \hat{F}(\rho(H_T)) \leq 1 - \alpha/2\right], \hat{F}(\rho(H_T))\right)$ .
- 

Lemma 1 is a direct consequence of the strong law of large numbers for sample means, which holds under the conditions of Assumption 1 even under adaptive designs. While asymptotic power is guaranteed by choosing the sample mean as our test statistic, obtaining valid type I error guarantees is obtained by our method of estimating nuisances  $\hat{\eta}$ . By estimating nuisances *optimistically*, we show that our simulation-based test provides valid error control.

### 3.2 Simulating with Optimism

The estimation of nuisances  $\eta$  plays a crucial role in controlling the type I error rate. Even with simple adaptive designs in the two-armed case, simple plug-in nuisances do not provide type I error guarantees even if nuisances are estimated at parametric (i.e.  $\Theta(1/\sqrt{T})$ ) rates. As a leading example of this phenomenon, we present a simple ETC design with two arms in Example 1.

**Example 1** (Two-Armed ETC). *Let  $K = 2$ , and arm outcome distributions  $P_1, P_2$  be any two distributions with finite variance. For  $t \leq T/2$ , let  $\pi_t$  map to the uniform distribution over  $[K]$ . For  $t > T/2$ , let  $\mathbb{P}_{\pi_t}(A_t = a) = 1$  for  $a = \operatorname{argmax}_a \hat{\mu}_{T/2}(a)$ , and  $\mathbb{P}_{\pi_t}(A_t = a) = 0$  otherwise.*

Consider the case where both arm distributions are known to be Bernoulli, such that the only nuisance  $\eta$  is  $\mu_2$ , the mean of arm 2. When  $\mu_1^* = \mu_2^* = 1/2$ , the limiting distribution of the sample mean test statistic  $\rho(H_T)$  is given in Equation 3, where  $Z_i$ 's denote i.i.d. standard normal variables.

$$\lim_{T \rightarrow \infty} \sqrt{T} (\rho(H_T) - \mu_1^*) \rightarrow_d \frac{Z_1 + \mathbf{1}[Z_1 \geq Z_2] \sqrt{2} Z_3}{1 + 2(\mathbf{1}[Z_1 \geq Z_2])} \quad (3)$$

If the distribution of observed statistic  $\rho(H_T)$  and the simulation-based statistic  $\rho(H_T^{(i)})$  are asymptotically equivalent under the correctly specified null  $\theta_0 = 1/2$ , the CDF of  $\rho(H_T^{(i)})$  converges to that of  $\rho(H_T)$ . This directly implies that Algorithm 2 provides asymptotic control of type I error. However, standard estimates for the nuisance  $\mu_2$  fail to provide distributional convergence. Using the sample mean estimate  $\hat{\mu}_T(2)$ , the limiting distribution of  $\rho(H_T^{(i)})$  is given by

$$\lim_{T \rightarrow \infty} \lim_{B \rightarrow \infty} \sqrt{T} (\rho(H_T^{(i)}) - \mu_1^*) \rightarrow_d \frac{Z_1 + \mathbf{1}\left[Z_1 \geq Z_2 + \frac{Z_2 + \mathbf{1}[Z_2 > Z_1] \sqrt{2} Z_4}{1 + 2(\mathbf{1}[Z_2 > Z_1])}\right] \sqrt{2} Z_3}{1 + 2\left(\mathbf{1}\left[Z_1 \geq Z_2 + \frac{Z_2 + \mathbf{1}[Z_2 > Z_1] \sqrt{2} Z_4}{1 + 2(\mathbf{1}[Z_2 > Z_1])}\right]\right)}, \quad (4)$$

which does not match the distribution of the observed test statistic  $\rho(H_T)$ .

**Remark 2** (Failure Even With Parametric Rates). *For Example 1, we show in Appendix D that for  $\rho(H_T)$  and  $\rho(H_T^{(i)})$  to share the same distribution, we require  $\sqrt{T}(\hat{\mu}_2 - \mu_2^*) \rightarrow_p 0$ . Even with  $T$  independent samples from arm 2, the right-hand side of Equation 4 becomes  $\frac{Z_1 + \mathbf{1}[Z_1 \geq Z_2 + Z_4/2] \sqrt{2} Z_3}{1 + 2(\mathbf{1}[Z_1 \geq Z_2 + Z_4/2])}$ , failing to match the distribution of the observed test statistic  $\rho(H_T)$ . As a result, asymptotic equivalence in the distribution for the test statistic  $\rho(H_T)$  and the simulated distribution of  $\rho(H_T^{(i)})$  is unachievable, even if nuisances are estimated at parametric rates on the order of  $\Theta(1/\sqrt{T})$ .*

Given that the distribution of the simulated test statistic  $\rho(H_T^{(i)})$  does not converge to that of  $\rho(H_T)$ , one may wish to avoid nuisance estimation altogether. A simple way to do so is to scan over all

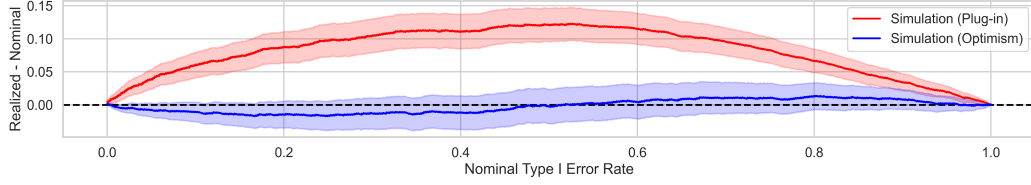

Figure 1: Plot of Realized Type I Error Rate with Plug-in and Optimistic Nuisances for ETC adaptive design with two arms.  $Y$ -axis corresponds to the difference between realized and nominal (i.e. desired) type I error rates. Shaded regions denote 90% confidence intervals for error rates over 10,000 simulations. Additional details for this set-up are provided in Appendix C.

possible values of the nuisances that affect both the experiment design and the distribution of the test statistic. In the ETC example above, this means sweeping over all possible values of  $\mu_2$  to test a single-point null  $\theta = \theta_0$ . We reject the null  $\theta = \theta_0$  if we reject this null for every value of  $\mu_2$  using Algorithm 2. With a grid fidelity of  $G$  over arm mean values,  $K$  arms, and  $B$  number of simulations, we require  $G^{K-1}B$  number of experiment simulations to test a single point null  $\theta_0$ . This approach becomes computationally infeasible rapidly for even moderate values of  $K$  and  $G$ .

### 3.2.1 Preserving Type I Error with Optimistic Nuisances

To avoid such an approach while preserving type I error, we add a small, positive bias to the estimated arm means in the nuisance vector when simulating new trajectories, which we call *simulation with optimism*. By adding positive bias to the mean of arm 2 in our ETC example, we obtain valid type I error control as the number of simulations  $B$  grows large. Figure 1 plots the difference in realized and nominal error rates under  $\mu_2 = \hat{\mu}_T(2)$  (plug-in) and our optimistic simulation procedure  $\mu_2 = \hat{\mu}_T(2) + \log \log N_T(2) / \sqrt{N_T(2)}$ . Optimistic nuisances result in type I error rates matching the nominal level, while the plug-in approach results in error rates up to 12% larger than desired.

Beyond our simple ETC example, the principle of optimism when simulating experiment runs controls type I error for a various designs, including reward-maximizing designs that violate positivity conditions necessary for popular reweighing approaches [11] (Example 2) and clipped experimental designs commonly used in practice (Example 3).

**Example 2 (UCB).** Let the arm distributions be any set of distributions  $\{P_a\}_{a \in [K]}$  with means  $\mu$  and finite variance. Let  $\pi_t(H_{t-1})$  select the arm  $A_t = \operatorname{argmax}_{a \in [K]} (\hat{\mu}_{t-1}(a) + \sqrt{2 \log(T)/N_{t-1}(a)})$ .

**Example 3 (Clipped Reward Maximizing Scheme).** Let the arm distributions be any set of any set of distributions  $\{P_a\}_{a \in [K]}$  with finite variance and means  $\mu$ , where there exists a unique optimal arm  $a^*$  such that  $\mu_{a^*} > \mu_a$  for all  $a \in [K] \setminus \{a^*\}$ . Let  $\pi_t(H_{t-1})$  be a randomized algorithm such that with probability  $\gamma > 0$ , we select over the arms uniformly, and with probability  $1 - \gamma$ , we select an arm such that  $\mathbb{P}(A_t \neq a^*) \leq c/t$ , where  $c$  is a constant independent of  $t$ .

We present our results for optimistic nuisance estimation across all examples in Theorem 1, which provides an approach for estimating the nuisance vector  $\eta$  for Algorithm 1 that preserves type I error.

**Theorem 1 (Error Control with Optimism).** For nuisance estimation in Algorithm 1, set  $\hat{\mu}_a = \hat{\mu}_T(a) + \epsilon_a$ , where (i)  $\epsilon_a > 0$ , and (ii)  $\sqrt{\frac{\log \log N_T(a)}{N_T(a)}} / \epsilon_a \rightarrow 0$  as  $T \rightarrow \infty$ . Let  $\hat{\sigma}_a^2 = \frac{1}{N_T(a)} \sum_{i=1}^T \mathbf{1}[A_t = a] (X_i - \hat{\mu}_T(a))^2$ . Denote Algorithm 2's decision to accept/reject the null hypothesis  $\theta_0$  as  $\xi(\theta_0, H_T, \alpha)$ . Then, for all  $\alpha \in [0, 1]$ , type I error is asymptotically controlled under Examples 1, 2, and 3 as the number of simulations  $B$  grows large, i.e.,

$$\limsup_{T \rightarrow \infty} \lim_{B \rightarrow \infty} \mathbb{P}(\xi(\theta^*, \alpha, H_T) = 1) \leq \alpha. \quad (5)$$

Because we add positive noise to all other mean arms (other than target arm 1), we call our procedure *simulation with optimism*. Intuitively, our approach is inspired by the fact that in many common designs, larger values for other arms' means leads to less samples being allocated to target arm 1.

---

**Algorithm 3** Confidence Interval and Point Estimate

---

- 1: **input:** observed data  $H_T$ , sampling scheme  $\pi$ , Type I error  $\alpha$ , simulation number  $B$ , grid of target parameter values  $\Theta_0$ .
  - 2: Initialize  $\hat{C}(\alpha) = \{\emptyset\}$  as the empty set.
  - 3: **for**  $\theta_0$  in  $\Theta_0$  **do**
  - 4:   Run Algorithm 2 with null hypothesis  $\theta_0$ , denoting accept/reject and the estimated quantile value as  $(\xi(\theta_0, H_T, \alpha), \hat{F}(\theta_0))$ .
  - 5:   If  $\xi(\theta_0, H_T, \alpha) = 0$ , then set  $\hat{C}(\alpha) = \hat{C}(\alpha) \cup \{\theta\}$ .
  - 6: **Return** Confidence interval  $\hat{C}(\alpha)$  and point estimate  $\hat{\theta} = \operatorname{argmin}_{\theta \in \hat{C}(\alpha)} |\hat{F}(\theta) - 1/2|$ .
- 

242 Although fewer samples naturally lead to larger upper (and smaller lower) quantiles for  $\rho(H_T)$ 's  
243 distribution in the i.i.d. case, it is unclear whether this holds for adaptively collected data. In Appendix  
244 D, we show that this holds across all examples discussed in Theorem 1.

245 Among our three examples, Example 1 is unique in that it does not permit asymptotic inference using  
246 a stability condition [15] such as Example 2 or with inverse-propensity-weighted estimates such as  
247 Example 3. Our approach uniquely addresses designs such as ETC, where (i) the number of arm pulls  
248 does not converge in probability as  $T \rightarrow \infty$  and (ii) observations cannot be reweighted for a similar  
249 form of stabilization as in Hadad et al. [11]. Our approach offers a valid form of inference beyond  
250 using only the data collected in the exploration period or conservative finite-sample inference.

251 **Decay of Bias Term.** The order of the bias  $\epsilon$  in Theorem 1 is a direct consequence of the law of  
252 iterated logarithm, which states that the difference between the sample mean and the true mean is on  
253 the order of  $\sqrt{\log \log N_T(a) / N_T(a)}$ . By adding positive bias that dominates this term as  $T \rightarrow \infty$ ,  
254 Theorem 1 ensures that our approach adds asymptotically positive bias to the arm mean nuisances.

255 **Remark 3** (Selecting bias term  $\epsilon$ ). *While Theorem 1 provides a lower bound on the order of the*  
256 *bias  $\epsilon$ , it does not specify an upper bound. In Appendix D, we justify our choice to make  $\epsilon \rightarrow 0$*   
257 *as  $N_T(a) \rightarrow \infty$  using our ETC setup in Example 1. We show that with vanishing bias  $\epsilon$ , our*  
258 *simulation procedure has higher power, leading to larger probabilities for rejecting misspecified*  
259 *nulls and smaller confidence interval widths. We empirically validate our choice of vanishing bias*  
260  *$\epsilon = \log \log N_T(a) / \sqrt{N_T(a)}$  used in Figure 1 in Appendix C.*

261 Importantly, simulation with optimistic nuisances preserves the computational tractability of this  
262 procedure. While sweeping over all possible nuisance values requires  $G^{K-1}B$  number of simulations  
263 for type I error control, our hypothesis testing procedure with optimism reduces the number of  
264 simulations to simply  $B$ , removing the runtime dependence on grid fidelity  $G$  and number of arms  $K$ .

### 265 3.3 Confidence Intervals and Point Estimation

266 Our approach for confidence interval construction and point estimation (provided in Algorithm 3)  
267 directly leverages the point null testing approach of Algorithm 2. Given a set of null values, we run  
268 our hypothesis testing procedure in Algorithm 2 for each null value. Our confidence interval  $\hat{C}(\alpha)$  is  
269 the subset of nulls that are not rejected by our hypothesis testing procedure. As our point estimate,  
270 we select the null that maximizes the minimum difference between quantile of observed test statistic  
271 and quantile rejection thresholds  $\{\alpha/2, 1 - \alpha/2\}$ , which gives the expression in Algorithm 3. We  
272 provide minimal convergence results for our confidence intervals and point estimate in Lemma 2.

273 **Lemma 2** (Convergence of Point Estimate and Confidence Sequence). *Let Assumption 1 hold, and*  
274 *assume arm variances are finite. Furthermore, assume  $\theta^* \in \Theta_0$ , i.e. the true null value is contained*  
275 *in the grid of tested nulls in Algorithm 3. Then, for any  $\alpha \in [0, 1]$ , our confidence interval converges*  
276 *almost surely to a zero-width set containing only  $\theta^*$ , and our point estimate  $\hat{\theta}$  converges to  $\theta^*$  almost*  
277 *surely, i.e.*

$$\lim_{T \rightarrow \infty} \lim_{B \rightarrow \infty} \hat{C}(\alpha) \rightarrow_{a.s.} \{\theta^*\}, \quad \lim_{T \rightarrow \infty} \lim_{B \rightarrow \infty} \hat{\theta} \rightarrow_{a.s.} \theta^*. \quad (6)$$

278 Both convergence results in Lemma 2 are direct consequences of Lemma 1, which provides uniform  
279 guarantees of rejection for all nulls  $\theta_0 \neq \theta^*$ . Because all  $\theta_0 \neq \theta^*$  are rejected almost surely, the

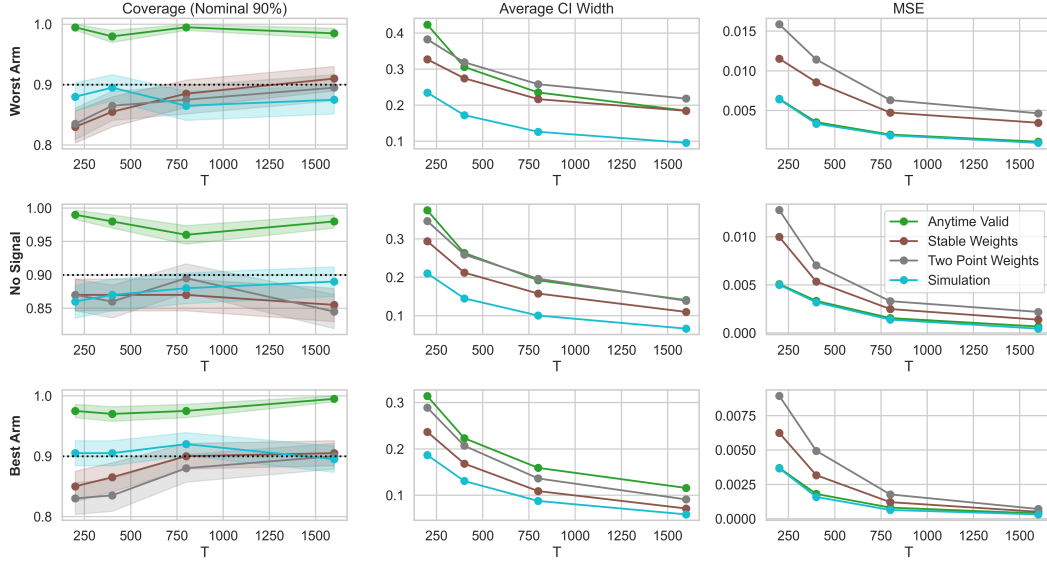

Figure 2: Coverage probabilities, average CI widths, and MSE for synthetic setup, with  $T$  values 200, 400, 800, 1600. Results are averaged over 200 simulations. Shaded region denotes 1 standard error.

confidence set  $\hat{C}(\alpha)$ , which consists of nulls that fail to be rejected, converges to  $\{\theta^*\}$ . Similarly, because  $\hat{\theta} \in \hat{C}(\alpha)$ ,  $\hat{\theta}$  must also converge to  $\theta^*$ .

**Remark 4.** One may ask whether our assumption that the ground truth value  $\theta^*$  lies in the set of tested target parameter values  $\Theta_0$  is reasonable, particularly for continuously valued  $\theta$ . In cases where  $\theta$  is known to lie in a bounded interval  $\tilde{\Theta}$ , one may set  $\Theta_0$  to be a grid over  $\tilde{\Theta}$  as an approximation. We demonstrate that this does not affect empirical performance in Section 4 below. For unbounded parameters, one may use another confidence interval to get a bounded interval, then use a finely spaced grid over this interval for  $\Theta_0$  using an adjusted  $\alpha$ -level<sup>2</sup>.

## 4 Experimental Results

We provide experimental results for type I error and confidence interval widths across both synthetic and real-world data. For all experiments, we set type I error rate  $\alpha = 0.1$ , and set  $\epsilon = \log \log N_T(a) / \sqrt{N_T(a)}$ , which satisfies the conditions of Theorem 1. We provide additional details, including runtime, baseline pseudocode, and results for alternative setups, in Appendix C.

**Synthetic Experiment Setup.** For the synthetic experiments, we set  $K = 3$  and set our target parameter to be the mean of arm 1. All arms are distributed according to a Bernoulli distribution with mean vectors  $\mu = [0.45, 0.5, 0.55]$ ,  $[0.5, 0.5, 0.5]$ , and  $[0.55, 0.5, 0.45]$  corresponding to the worst arm, no signal, and best arm settings respectively. For our confidence intervals, we test a grid of 100 null values evenly spaced between  $[0, 1]$ , the range of mean values, with  $B = 200$  simulations per mean value. To compute mean square error (MSE), we use the null  $\theta_0$  with  $p$ -value  $\hat{F}(\rho(H_T))$  closest to 0.5 as a heuristic point estimate. As our baselines, we test three distinct approaches for valid inference for adaptively collected data: (i) an empirical Bernstein anytime valid approach [28], (ii) an asymptotic approach based on variance stabilizing weights [11, 33], and (iii) an asymptotic approach based on variance minimizing weights [11]. To accommodate the latter two approaches, we present results using a modified UCB (Example 2) scheme with clipping at the rate of  $t^{-0.7}$ .

**Real-World Data.** To assess the performance of our approach on real-world data, we reanalyze the results of an adaptive experiment run by Offer-Westort et al. [20]. The adaptive experiment design used a batched Thompson sampling procedure with  $T = 1000$  on Amazon’s MTurk platform.

<sup>2</sup>We discuss this approach in Appendix A using the anytime valid bounds of Waudby-Smith et al. [29]



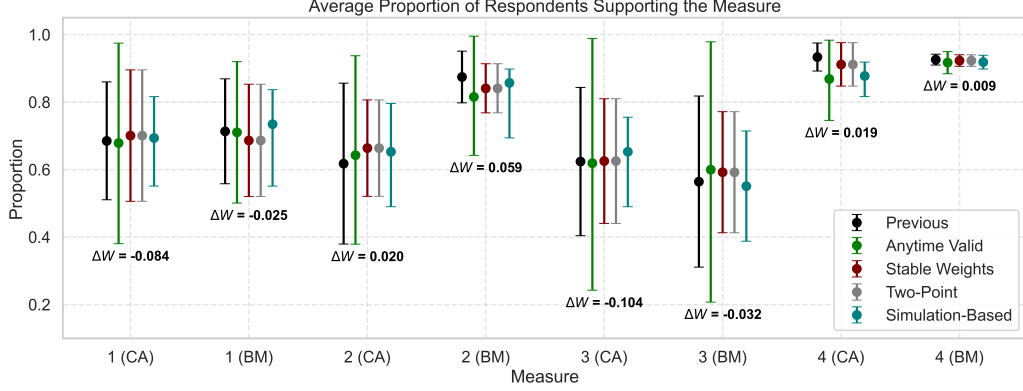

Figure 3: 90% Confidence Intervals for real-world data. The difference in CI widths between our simulation-based approach and the smallest width interval among baselines is annotated as  $\Delta W$ .

Arms correspond to different wordings of the ballot measure, and outcomes corresponding to binary responses indicating whether the respondent would support the measure. As an additional baseline, we provide the intervals reported by Offer-Westort et al. [20]. For each confidence interval based on our simulation procedure, we test a grid of 200 null values evenly spaced between  $[0, 1]$ , with  $B = 1000$  simulations per null value, and use the same heuristic as above for our point estimate.

**Discussion of Results.** Our empirical results demonstrate the key benefits of our simulation-based approach: across both synthetic and real-world data, our simulation-based confidence intervals tend to produce smaller confidence intervals, while maintaining similar coverage (e.g. type I error) as existing approaches. Across all experiments, confidence interval widths are reduced by as much as 50% relative to the next best method, demonstrating the benefits of simulation-based inference.

Figure 2 plots the results of our synthetic experiments with respect to  $T$ , the total duration of the experiment. The rates of coverage (i.e. the probability that the null  $\theta = \mu_1^*$  is not rejected) demonstrates that our approach provides similar type I error guarantees to the two other asymptotic methods. Given similar coverage/error rates, our simulation-based confidence intervals and point estimates provide the tightest confidence intervals on average and smallest MSE across all setups. The largest gains, particularly in terms of confidence interval width, are in the setting where we conduct inference on the worst arm, where we see up to 50% reductions in average width.

Our real-world experiments demonstrate similar results to our synthetic setup. For arms that appear to be the worst-performing (such as Proposal 3 (CA)), our simulation-based approach reduces confidence interval widths drastically. The three proposals with the lowest support see reductions of up to roughly 50% in terms of confidence interval width relative to the intervals reported by Offer-Westort et al. [20]. While the best performing arms see a slight increase in interval width, we note that the width decreases in the worst performing arms are significantly larger than the width gains in the best performing arms. Intervals grow by at most 0.059 relative to the best performing baseline, while being decreasing widths up to 0.1. Furthermore, simulation outperforms all existing baselines for a majority of treatment arms and is never widest among all approaches.

**Conclusion** This paper introduces a simulation-based method for conducting inference in experiments with adaptive designs, where traditional confidence intervals and hypothesis tests often fail. By simulating the experiment under the null hypothesis using *optimistic* nuisances with positive bias, the method ensures valid type I error control. Across both synthetic and real-world experiments, empirical results show that our simulation-based approach significantly reduces confidence interval widths—up to 50% smaller for undersampled arms—while maintaining accurate statistical coverage.

## References

- [1] P. Auer, N. Cesa-Bianchi, Y. Freund, and R. E. Schapire. The nonstochastic multiarmed bandit problem. *SIAM Journal on Computing*, 32(1):48–77, 2002. doi: 10.1137/S0097539701398375. URL <https://doi.org/10.1137/S0097539701398375>.
- [2] A. Bibaut and N. Kallus. Demystifying inference after adaptive experiments, 2024. URL <https://arxiv.org/abs/2405.01281>.
- [3] A. Bibaut, A. Chambaz, M. Dimakopoulou, N. Kallus, and M. van der Laan. Post-contextual-bandit inference, 2021.
- [4] A. Bibaut, A. Chambaz, M. Dimakopoulou, N. Kallus, and M. van der Laan. Post-contextual-bandit inference, 2021. URL <https://arxiv.org/abs/2106.00418>.
- [5] A. Bibaut, N. Kallus, and M. Lindon. Near-optimal non-parametric sequential tests and confidence sequences with possibly dependent observations, 2024. URL <https://arxiv.org/abs/2212.14411>.
- [6] V. Chernozhukov, D. Chetverikov, M. Demirer, E. Duflo, C. Hansen, W. Newey, and J. Robins. Double/debiased machine learning for treatment and structural parameters. *The Econometrics Journal*, 21(1):C1–C68, 01 2018. ISSN 1368-4221. doi: 10.1111/ectj.12097. URL <https://doi.org/10.1111/ectj.12097>.
- [7] B. Cho, K. Gan, and N. Kallus. Peeking with peak: Sequential, nonparametric composite hypothesis tests for means of multiple data streams, 2024. URL <https://arxiv.org/abs/2402.06122>.
- [8] B. Cho, D. Meier, K. Gan, and N. Kallus. Reward maximization for pure exploration: Minimax optimal good arm identification for nonparametric multi-armed bandits, 2024. URL <https://arxiv.org/abs/2410.15564>.
- [9] T. J. DiCiccio and B. Efron. Bootstrap confidence intervals. *Statistical Science*, 11(3):189 – 228, 1996. doi: 10.1214/ss/1032280214. URL <https://doi.org/10.1214/ss/1032280214>.
- [10] V. Gabillon, M. Ghavamzadeh, A. Lazaric, and S. Bubeck. Multi-bandit best arm identification. In *Proceedings of the 25th International Conference on Neural Information Processing Systems, NIPS’11*, page 2222–2230, Red Hook, NY, USA, 2011. Curran Associates Inc. ISBN 9781618395993.
- [11] V. Hadad, D. A. Hirshberg, R. Zhan, S. Wager, and S. Athey. Confidence intervals for policy evaluation in adaptive experiments. *Proceedings of the National Academy of Sciences*, 118(15): e2014602118, 2021. doi: 10.1073/pnas.2014602118. URL <https://www.pnas.org/doi/abs/10.1073/pnas.2014602118>.
- [12] P. Hall, C. Heyde, Z. Birnbaum, and E. Lukacs. *Martingale Limit Theory and Its Application*. Communication and Behavior. Academic Press, 2014. ISBN 9781483263229. URL <https://books.google.com/books?id=gqriBQAAQBAJ>.
- [13] S. R. Howard, A. Ramdas, J. McAuliffe, and J. Sekhon. Time-uniform, nonparametric, nonasymptotic confidence sequences. *The Annals of Statistics*, 49(2), apr 2021. doi: 10.1214/20-aos1991. URL <https://doi.org/10.1214/20-aos1991>.
- [14] F. Hu and W. F. Rosenberger. *The theory of response-adaptive randomization in clinical trials*. John Wiley & Sons, 2006.
- [15] K. Khamaru and C.-H. Zhang. Inference with the upper confidence bound algorithm, 2024. URL <https://arxiv.org/abs/2408.04595>.
- [16] T. Lai and H. Robbins. Asymptotically efficient adaptive allocation rules. *Advances in Applied Mathematics*, 6(1):4–22, 1985. ISSN 0196-8858. doi: [https://doi.org/10.1016/0196-8858\(85\)90002-8](https://doi.org/10.1016/0196-8858(85)90002-8). URL <https://www.sciencedirect.com/science/article/pii/0196885885900028>.

- [17] T. Lai and H. Robbins. Asymptotically efficient adaptive allocation rules. *Adv. Appl. Math.*, 6(1):4–22, Mar. 1985. ISSN 0196-8858. doi: 10.1016/0196-8858(85)90002-8. URL [https://doi.org/10.1016/0196-8858\(85\)90002-8](https://doi.org/10.1016/0196-8858(85)90002-8).
- [18] D. L. McLeish. Dependent Central Limit Theorems and Invariance Principles. *The Annals of Probability*, 2(4):620 – 628, 1974. doi: 10.1214/aop/1176996608. URL <https://doi.org/10.1214/aop/1176996608>.
- [19] X. Nie, X. Tian, J. Taylor, and J. Zou. Why adaptively collected data have negative bias and how to correct for it. In A. Storkey and F. Perez-Cruz, editors, *Proceedings of the Twenty-First International Conference on Artificial Intelligence and Statistics*, volume 84 of *Proceedings of Machine Learning Research*, pages 1261–1269. PMLR, 09–11 Apr 2018. URL <https://proceedings.mlr.press/v84/nie18a.html>.
- [20] M. Offer-Westort, A. Coppock, and D. Green. Adaptive experimental design: Prospects and applications in political science. *American Journal of Political Science*, 65, 02 2021. doi: 10.1111/ajps.12597.
- [21] A. Ramdas, P. Grünwald, V. Vovk, and G. Shafer. Game-Theoretic Statistics and Safe Anytime-Valid Inference. *Statistical Science*, 38(4):576 – 601, 2023. doi: 10.1214/23-STS894. URL <https://doi.org/10.1214/23-STS894>.
- [22] H. Robbins. Some aspects of the sequential design of experiments. *Bulletin of the American Mathematical Society*, 58(5):527 – 535, 1952.
- [23] W. F. Rosenberger and F. Hu. Bootstrap methods for adaptive designs. *Statistics in Medicine*, 18(14):1757–1767, 1999. doi: [https://doi.org/10.1002/\(SICI\)1097-0258\(19990730\)18:14<1757::AID-SIM212>3.0.CO;2-R](https://doi.org/10.1002/(SICI)1097-0258(19990730)18:14<1757::AID-SIM212>3.0.CO;2-R). URL <https://onlinelibrary.wiley.com/doi/abs/10.1002/%28SICI%291097-0258%2819990730%2918%3A14%3C1757%3A%3AAID-SIM212%3E3.0.CO%3B2-R>.
- [24] J. Shin, A. Ramdas, and A. Rinaldo. On the bias, risk and consistency of sample means in multi-armed bandits, 2021. URL <https://arxiv.org/abs/1902.00746>.
- [25] J. Trommer. Resampling methods for dependent data. *Biometrics*, 62(2):633–634, 06 2006. ISSN 0006-341X. doi: 10.1111/j.1541-0420.2006.00589\_12.x. URL [https://doi.org/10.1111/j.1541-0420.2006.00589\\_12.x](https://doi.org/10.1111/j.1541-0420.2006.00589_12.x).
- [26] A. W. v. d. Vaart. *Asymptotic Statistics*. Number 9780521784504 in Cambridge Books. Cambridge University Press, Enero 2000. URL <https://ideas.repec.org/b/cup/cbooks/9780521784504.html>.
- [27] J. Ville. *Étude critique de la notion de collectif*. 1939. URL <http://eudml.org/doc/192893>.
- [28] I. Waudby-Smith and A. Ramdas. Estimating means of bounded random variables by betting, 2022. URL <https://arxiv.org/abs/2010.09686>.
- [29] I. Waudby-Smith, D. Arbour, R. Sinha, E. H. Kennedy, and A. Ramdas. Time-uniform central limit theory and asymptotic confidence sequences, 2024. URL <https://arxiv.org/abs/2103.06476>.
- [30] I. Waudby-Smith, L. Wu, A. Ramdas, N. Karampatziakis, and P. Mineiro. Anytime-valid off-policy inference for contextual bandits, 2024. URL <https://arxiv.org/abs/2210.10768>.
- [31] L. J. Wei, R. T. Smythe, D. Y. Lin, and T. S. Park. Statistical inference with data-dependent treatment allocation rules. *Journal of the American Statistical Association*, 85(409):156–162, 1990. ISSN 01621459, 1537274X. URL <http://www.jstor.org/stable/2289538>.
- [32] R. Zhan, V. Hadad, D. A. Hirshberg, and S. Athey. Off-policy evaluation via adaptive weighting with data from contextual bandits, 2021. URL <https://arxiv.org/abs/2106.02029>.
- [33] K. W. Zhang, L. Janson, and S. A. Murphy. Statistical inference with m-estimators on adaptively collected data, 2021. URL <https://arxiv.org/abs/2104.14074>.

433 [34] J. Zhao. Adaptive neyman allocation. In *Proceedings of the 25th ACM Conference on Economics*  
434 *and Computation*, EC '24, page 776, New York, NY, USA, 2024. Association for Computing  
435 Machinery. ISBN 9798400707049. doi: 10.1145/3670865.3673535. URL [https://doi.org/](https://doi.org/10.1145/3670865.3673535)  
436 [10.1145/3670865.3673535](https://doi.org/10.1145/3670865.3673535).

## A Additional Results for Inference on Means

### A.1 Intuition on Vanishing Bias $\epsilon_a$

A natural question is why we choose the bias term to vanish. Under the conditions of Theorem 1, simply setting  $\hat{\mu}_a = 1$  (the upper bound of the support) preserves Type I error. To see the value of vanishing positive bias, consider the ETC design discussed in Section 3.2, but  $\mu_2^* < \mu_1^* < 1$ . The limit distribution of  $\rho(H_T)$ , the sample mean of arm 1, takes the form:

$$\lim_{T \rightarrow \infty} \sqrt{T} (\rho(H_T) - \mu_1^*) \rightarrow_d \frac{2\sigma_1^* Z_1 + 2\sqrt{2}\sigma_1^* Z_2}{3} = \frac{2\sigma_1^* Z_3}{\sqrt{3}}, \quad (7)$$

where  $\sigma_1^* = \sqrt{\mu_1^*(1 - \mu_1^*)}$  is the true standard deviation of arm 1 and  $Z_1, Z_2, Z_3$  are i.i.d. normal random variables. If we set the nuisance value  $\hat{\eta} = \hat{\mu}_2$  equal to the maximum possible value of 1, then, for any null value  $\theta_0$ , the distribution of the test statistic using simulated trajectories  $H_T^{(i)}$  is given by

$$\lim_{T \rightarrow \infty} \sqrt{T} (\rho(H_T^{(i)}) - \theta_0) \rightarrow_d 2Z_1 \sqrt{(1 - \theta_0)\theta_0} \quad (8)$$

for all  $\theta_0 \in [0, 1)$ . In contrast, under a simulation procedure where  $\hat{\eta} \rightarrow \mu_2^*$ , the limiting distribution of the test statistic takes a piecewise form, given by the following:

$$\lim_{T \rightarrow \infty} \sqrt{T} (\rho(H_T^{(i)}) - \theta_0) \rightarrow_d \frac{2Z_1 \sqrt{(1 - \theta_0)\theta_0} + (\mathbf{1}[\theta_0 > \mu_2]) Z_3 \sqrt{8(1 - \theta_0)\theta_0}}{1 + 2(\mathbf{1}[\theta_0 > \mu_2])}. \quad (9)$$

While the power (i.e. the probability of rejection when  $\theta_0 \neq \mu_1^*$ ) is unchanged for values of  $\theta_0 < \mu_2^*$ , a vanishing bias term results in improved power for all values of  $\theta_0 > \mu_2^*$ . When  $\theta_0 > \mu_2$ , the simulated distribution of the test statistic  $\rho(H_T^{(i)})$  is more tightly centered around the value  $\theta_0$  compared to the choice of  $\hat{\mu}_2 = 1$  by a factor of  $1/\sqrt{3}$ . As a result, the probability that our observed test statistic  $\rho(H_T)$  lies beyond the lower and upper quantiles of simulated distribution is larger under nuisances  $\hat{\eta}$  that converge to  $\eta^*$ .

### A.2 Confidence Intervals for Unbounded Parameter Spaces.

While the main body of our paper focuses on bounded parameter spaces (e.g.  $\theta^* \in [0, 1]$ ), one can construct a bounded region of the parameter space by using the confidence interval in Theorem 2.2 of Waudby-Smith et al. [29] with  $\alpha_1$ , then use  $\alpha_2$  for Algorithm 2, where  $\alpha_1 + \alpha_2 = \alpha$ . This maintains statistical validity by a union-bound argument. Note that to preserve power as close as possible to our simulation procedure, one should set  $\alpha_2 \gg \alpha_1$ , as  $\alpha_1$  is only used to construct a bounded set over which we construct a fine grid.

## B Inference on Difference in Means

For our difference-in-means parameter, our approach is almost unchanged. Without loss of generality, assume that our target parameter is now  $\theta = \mu_1 - \mu_2$ . We can use the same exact approach as the main body of our paper, where we use a plug-in estimate  $\hat{\mu}_2$  with positive bias and now vary  $\theta = \mu_1 - \mu_2$ . Note that in effect, varying  $\theta = \mu_1 - \mu_2$  is the same as varying  $\theta = \mu_1$  in our simulations. We opt for the same test statistic as before.

Note that to preserve statistical validity, one cannot select  $\mu_1$  (or  $\mu_2$ ) into the nuisance vector  $\hat{\eta}$  while looking at the data. However, if one knows that the design will pull an arm more often (e.g. control-augmented sampling such as Offer-Westort et al. [20]), then one should use the arm that will be pulled more often to improve power.

One may ask why we do not recommend using a test statistic such as the difference in sample means. Note that by using two sums (rather than one) as our test statistic, the variance of our test statistic increases, and therefore results in less power. As such, randomly selecting one of the arms' sample mean as the test statistic for the difference-in-means target parameter will have higher power (lower variance) than including both means.

## C Additional Experimental Results

All computational results in both the main body and the appendix were run locally on a 14-inch MacBook Pro with an Apple M2 Pro chip and 16GB of memory.

### C.1 Runtime

Our confidence interval runtimes (i.e. the time to construct a confidence set) depend on  $G$ , the number of point nulls in  $\Theta_0$ , our set of nulls, and  $B$ , the number of simulations done per null. In particular, our runtime scales on the order of  $O(GB)$ . To demonstrate this scaling, we provide runtime results in Table 1, using the real-world dataset collected under a batched Thompson sampling scheme.

| $G$ | $B$ | Runtime (seconds) |
|-----|-----|-------------------|
| 50  | 50  | $11.50 \pm 0.22$  |
| 50  | 100 | $20.21 \pm 0.32$  |
| 100 | 50  | $20.66 \pm 0.30$  |
| 100 | 100 | $39.17 \pm 0.36$  |

Table 1: Table of runtimes for constructing confidence intervals for the real-world dataset.

Our table verifies our runtime scaling. As  $G$  doubles, the runtimes doubles exactly. Likewise, as  $B$  doubles, the runtime also doubles. We note that these runtimes are obtained by running this code locally. Running experiments on a cluster or a HPC setup will likely improve performance, but runtimes are reasonable even on local devices. As such, we do not believe our approach is prohibitively expensive computationally.

### C.2 Additional Experiment Details

**Synthetic Experiments** We provide additional pseudocode for all sampling schemes used in our experiments. We begin with our clipped modifications to UCB, where we provide our clipping procedure in Algorithm 4.

---

#### Algorithm 4 Clipped Adaptive Design with Decaying Exploration

---

- 1: **Input:** horizon  $T$ , arm number  $K$ , sampling scheme  $\pi$ , decay rate  $\beta \in [0, 1]$ .
  - 2: Initialize  $\hat{\mu}_0(a) = 0$ ,  $N_T(a) = 0$  for all  $a \in [K]$ .
  - 3: Sample each arm  $a \in [K]$  once.
  - 4: **for**  $t \in [T]$  **do**
  - 5:   Sample  $b \sim \text{Unif}[0, 1]$ .
  - 6:   **if**  $b \leq t^{-\beta}$  **then**
  - 7:     Sample an arm  $A_t \in [K]$ , with  $\mathbb{P}(A_t = a | H_{t-1}) = 1/K$ .
  - 8:   **else**
  - 9:     Sample an arm  $A_t \sim \pi_t(H_{t-1})$ .
  - 10: **Return** trajectory  $H_T$ .
- 

For our clipped UCB scheme, we use the sampling scheme  $\pi$  described in Example 2. Another choice of  $\pi$  we test below is the  $\epsilon$ -greedy scheme, where  $\pi_t(H_{t-1})$  selects the arm  $A_t = \arg\max_{a \in [K]} \hat{\mu}_{t-1}(a)$ , and explore based on the decay rate  $\beta \in [0, 1]$ . For both our clipped UCB and  $\epsilon$ -greedy scheme, we set  $\beta = 0.7$ , matching the exploration decay rates found in Hadad et al. [11].

**Real-World Experiments** The real-world dataset we use for constructing confidence intervals was collected by Offer-Westort et al. [20] on the Amazon MTurk Platform. Here, 1000 participants were recruited from June 21st, 2018 to June 30th, 2018, where each subject was paid 1\$ for their participation. We construct confidence intervals on the RTW treatments and responses. The wordings of each ballot measure can be found in Table 2 of Offer-Westort et al. [20], and are based on ballot measures in Missouri, North Dakota, Oklahoma, and South Dakota.

504 **Details for Figure 1** In Figure 1, we generate observations from two arms, both with rewards  
505  $X_t \sim N(0, 1)$ . We slightly modify our ETC example, where we sample both arms  $T/10$  times, and  
506 commit to the arm with the largest empirical mean at time  $T/5$  for the remaining duration of  $4T/5$ .  
507 We set  $T = 5000$ , with 10,000 replications for Figure 1.

### 508 C.3 Additional Experiment Results

509 We provide additional experimental results regarding (i) a different sampling scheme as our adaptive  
510 design and (ii) a different choice of bias for the ETC example in Figure 1.

511  **$\epsilon$ -Greedy Design** We choose the  $\epsilon$ -greedy design as an additional candidate for our approach.  
512 This design is known to have poor limiting distribution properties (see the first figure of Khamaru  
513 and Zhang [15]). We present our results in Figure 5. Our conclusions remain unchanged, as we  
514 see the largest gains (e.g. decreases in interval width) for the means of arms that are sampled less  
515 often. Interestingly, we see that our heuristic for selecting the point estimate outperforms all other  
516 approaches here. We plan to investigate this in future work by providing theoretical guarantees  
517 regarding our point estimate approach.

518 **Choice of Bias Term** To investigate our choice of optimistic bias term, we test multiple different  
519 choices of  $\epsilon_a$  in Figure 4 under the same setting as Figure 1.

- 520 • Bias 1 denotes  $\epsilon_a = \frac{\log \log N_T(a)}{\sqrt{N_T(a)}}$ .
- 521 • Bias 2 denotes  $\epsilon_a = \frac{\log N_T(a)}{\sqrt{N_T(a)}}$
- 522 • Bias 3 denotes  $\epsilon_a = 1$ .

523 Bias 2 and 3 are intended to demonstrate that our choice of bias term (Bias 1), which is close to the  
524 lower bound rate of  $\sqrt{\log \log N_T(a)/N_T(a)}$  in Theorem 1, is preferable in practice. While All three  
525 methods provide appropriate type I error control (as defined in Definition 1), Bias 1 (the bias term  
526 used in our paper) demonstrates superior power for nulls  $\theta_0 = 0.02$  close to the ground truth value  
527 of  $\theta^* = 0$ . This suggests that the bias term  $\epsilon_a$  should be set as close to  $\sqrt{\log \log N_T(a)/N_T(a)}$  as  
528 possible.

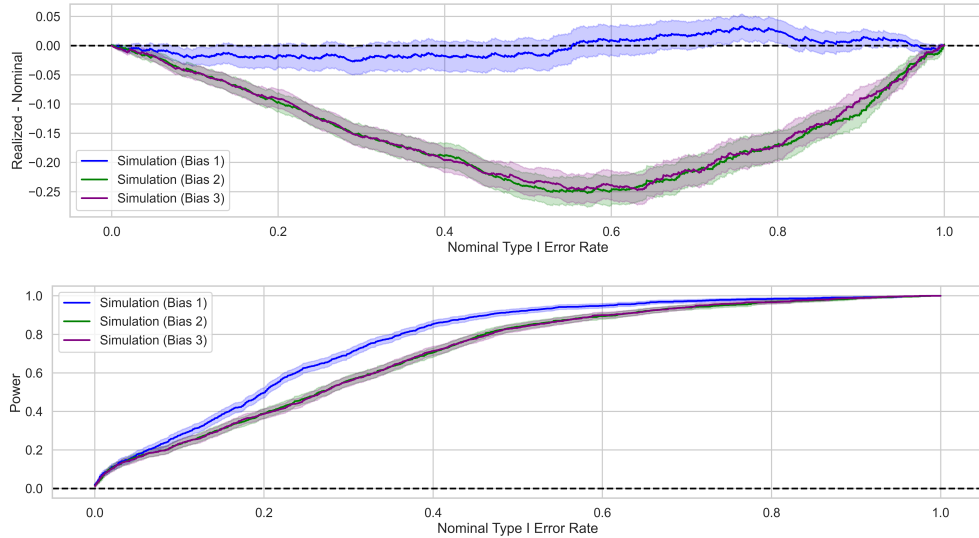

Figure 4: Top: Type I error rates based on magnitude of bias term  $\epsilon_a$ , using the null  $\theta^* = 0$ . Bottom: Power against the null  $\theta_0 = 0.02$

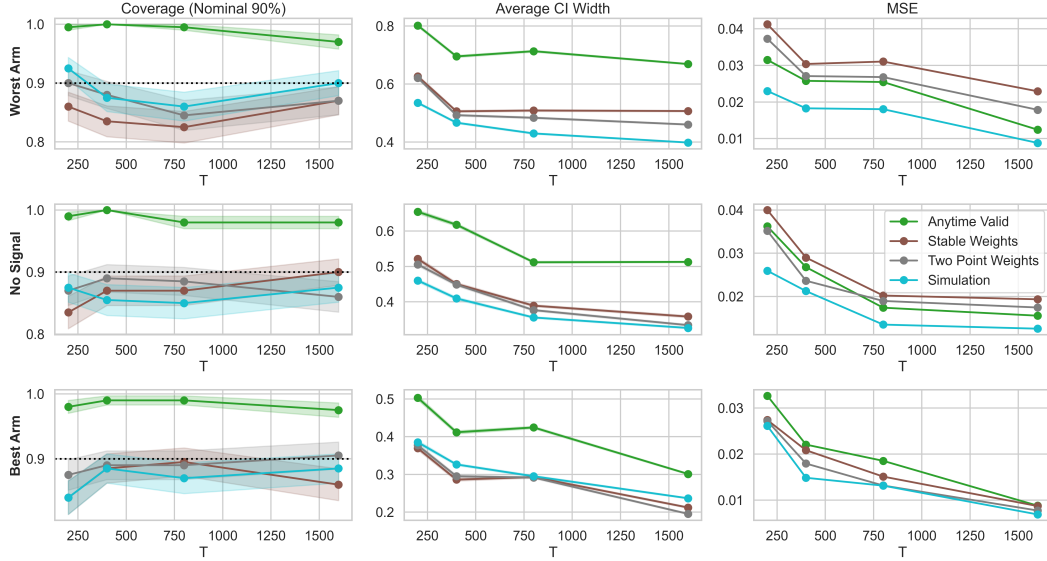

Figure 5: Coverage probabilities, average CI widths, and MSE for synthetic setup using the clipped  $\epsilon$ -greedy scheme, with  $T$  values 200, 400, 800, 1600. Results are averaged over 200 simulations. Shaded region denotes 1 standard error.

## 529 D Proofs of Theoretical Results

530 We use  $\omega$  to index sample paths from the set of all sample paths  $\Omega$ , where  $P(\Omega) = 1$ . For a random  
 531 variable  $X$ , we use the notation  $X(\omega)$  to index its sample path. Before providing our proofs, we  
 532 provide a technical lemma from existing work that provides almost sure convergence guarantees. For  
 533 completeness, we provide these results below.

534 **Lemma 3** (Fact E.1, Shin et al. [24]). *Suppose that there exists a process  $(Y_n)_{n=1}^\infty$  indexed by  $n$ , and  
 535  $Y_n \rightarrow Y$  a.s. as  $n \rightarrow \infty$ . Furthermore, assume that there exists an index process  $(N(t))_{t=1}^\infty$  indexed  
 536 by  $t$  such that  $N(t) \rightarrow \infty$  a.s. as  $t \rightarrow \infty$ . Then  $Y_{N(t)} \rightarrow Y$  as  $t \rightarrow \infty$ .*

537 We also provide a simplified version of the law of iterated logarithm, which underlies the magnitude  
 538 of the positive bias term  $\epsilon_a$  added to preserve type I error.

539 **Lemma 4** (Law of Iterated Logarithm [29]). *Let  $(X_i)_{i=1}^\infty$  be a sequence of i.i.d. random variables  
 540 with mean  $\mu$  and variance  $\sigma^2 < \infty$ . Let  $\hat{\mu}_T = \frac{1}{T} \sum_{i=1}^T X_i$ . Then, the following holds almost surely:*

$$\limsup_{T \rightarrow \infty} \frac{\sqrt{T} |\hat{\mu}_T - \mu|}{\sigma \sqrt{2 \log \log T}} = 1. \quad (10)$$

541 As a direct application of Lemmas 3 and 4, we obtain a simple, yet useful result regarding our  
 542 optimistic nuisances  $\hat{\mu}_a$ .

543 **Corollary 1** (Almost-Sure Positive Bias). *Let  $\hat{\mu}_a = \hat{\mu}_T(a) + \epsilon_a$ , where  $\hat{\mu}_T(a)$  denotes the sample  
 544 mean up to time  $t$  and  $\epsilon_a$  satisfies the conditions posed in Theorem 1. Let Assumption 1 hold, and  
 545 assume arm variances are finite. Then, as  $T \rightarrow \infty$ ,  $\hat{\mu}_a \geq \mu_a^*$  almost surely, i.e.*

$$\mathbb{P} \left( \limsup_{T \rightarrow \infty} \{\omega \in \Omega : \mathbf{1}[\hat{\mu}_a(\omega) \geq \mu_a^*] = 0\} \right) = 0. \quad (11)$$

546 *Proof of Corollary 1.* This follows directly from Lemmas 3 and 4. For completeness, we prove this  
 547 result by contradiction. Assume there exists a set of sample paths  $\Omega' \subseteq \Omega$  such that  $\mathbb{P}(\omega') > 0$ ,  
 548 and  $\mathbb{P}(\limsup_{T \rightarrow \infty} \{\omega \in \Omega' : \mathbf{1}[\hat{\mu}_a(\omega) \geq \mu_a^*] = 0\}) = 1$ . Then, this implies that for  $\omega \in \Omega'$ , the  
 549 following must hold:

$$\limsup_{\omega \in \Omega', T \rightarrow \infty} \hat{\mu}_a(\omega) - \mu_a^* = \limsup_{\omega \in \Omega', T \rightarrow \infty} \hat{\mu}_T(a)(\omega) + \epsilon_a(\omega) - \mu_a \leq 0. \quad (12)$$



550 Multiplying by  $\frac{\sqrt{N_T(a)(\omega)}}{\sigma_a^* \sqrt{2 \log \log N_T(a)(\omega)}}$  on both sides, we obtain

$$\limsup_{\omega \in \Omega', T \rightarrow \infty} \frac{\sqrt{N_T(a)(\omega)} (\hat{\mu}_T(a)(\omega) - \mu_a^*)}{\sigma_a^* \sqrt{2 \log \log N_T(a)(\omega)}} + \frac{\sqrt{N_T(a)(\omega)}}{\sigma_a^* \sqrt{2 \log \log N_T(a)(\omega)}} \epsilon_a \leq 0. \quad (13)$$

551 By the condition on  $\epsilon_a$  in Theorem 1, the second term on the LHS diverges to infinity, so the first term  
552 must diverge to negative infinity. However, note that by Lemmas 3 and 4, the following must hold:

$$\limsup_{\omega \in \Omega, T \rightarrow \infty} \frac{\sqrt{N_T(a)(\omega)} |\hat{\mu}_T(a)(\omega) - \mu_a^*|}{\sqrt{2 \log \log N_T(a)(\omega)}} = 1. \quad (14)$$

553 Because  $\Omega' \subseteq \Omega$ , we obtain the following inequality:

$$\limsup_{\omega \in \Omega', T \rightarrow \infty} \frac{\sqrt{N_T(a)(\omega)} |\hat{\mu}_T(a)(\omega) - \mu_a^*|}{\sqrt{2 \log \log N_T(a)(\omega)}} \leq \limsup_{\omega \in \Omega, T \rightarrow \infty} \frac{\sqrt{N_T(a)(\omega)} |\hat{\mu}_T(a)(\omega) - \mu_a^*|}{\sqrt{2 \log \log N_T(a)(\omega)}} = 1, \quad (15)$$

554 which results in a contradiction and therefore completes our proof.  $\square$

555 Lastly, we present a known result regarding asymptotic normality of sample means.

556 **Lemma 5** (Asymptotic Normality under Stability [15]). *Let  $P_a$  have finite variance, and assume*  
557 *that there exists a constant  $N_a^*(T)$  such that the following holds:*

558 (i)  $N_T(a) \rightarrow_P N_a^*(T)$  as  $T \rightarrow \infty$

559 (i)  $N_a^*(T) \rightarrow \infty$  as  $T \rightarrow \infty$ .

560 Then, whenever  $\hat{\sigma}_a$  is a consistent estimate of  $\sigma_a^*$ ,  $\sqrt{\frac{N_T(a)}{\hat{\sigma}_a}} (\hat{\mu}_T(a) - \mu_a^*) \rightarrow_d N(0, 1)$ .

561 We will leverage this result heavily for the proof of Examples 2 and 3 in Theorem 1.

## 562 D.1 Proof of Lemma 1

563 By the infinite sampling condition in Assumption 1, as  $T \rightarrow \infty$ ,  $N_T(a) \rightarrow \infty$  for all  $a \in [K]$  for  
564 any underlying arm distributions  $\{P_a\}_{a \in [K]}$ . Note that this includes any potential choice of null  $\theta_0$   
565 used in Algorithms 1 and 2. By direct application of Lemma 3 and the strong law of large numbers  
566 (SLLN), under any choice of null value  $\theta_0$ , the sample mean test statistic  $\rho(H_T^{(i)}) \rightarrow_{a.s.} \theta_0$ . By  
567 definition of almost sure convergence, using  $i$  to denote the simulation number and  $\omega$  to index the  
568 sample path of the observed experiment,

$$\mathbb{P} \left( \limsup_{T \rightarrow \infty} \{i \in [B], \omega \in \Omega : |\rho(H_T^{(i)})(\omega) - \theta_0| > \epsilon\} \right) = 0 \quad \text{for all } \epsilon > 0. \quad (16)$$

569 For any  $\theta_0 \neq \theta^*$ , let  $\epsilon^* = \frac{|\theta_0 - \theta^*|}{3}$ . As  $T \rightarrow \infty$ , for all  $\omega \in \Omega$ , Equation 16 implies that there exists  
570 an  $T_1(\omega) < \infty$  such that  $\sup_{i \in [B]} |\rho(H_T^{(i)})(\omega) - \theta_0| < \epsilon^*$  for all  $T > T_1(\omega)$ .

571 For the observed test statistic  $\rho(H_T)$ , by Assumption 1 and Lemma 3, we obtain  $\rho(H_T) \rightarrow_{a.s.} \theta^*$ ,  
572 i.e. for all  $\omega \in \Omega$ , there exists a  $T_2(\omega) < \infty$  such that  $|\rho(H_T)(\omega) - \theta^*| < \epsilon^*$  for all  $T > T_2(\omega)$ .

573 Putting these results together, we obtain that for any  $\omega \in \Omega$ , there exists a finite  $T^*(\omega) =$   
574  $\max(T_1(\omega), T_2(\omega)) < \infty$  such that  $\sup_{i \in [B]} |\rho(H_T^{(i)})(\omega) - \theta_0| < \epsilon^*$  and  $|\rho(H_T)(\omega) - \theta^*| < \epsilon^*$ . As  
575 a result, we obtain the quantile of  $\rho(H_T)$  with respect to the simulated test statistic distribution  
576  $\left(\rho(H_t^{(i)})\right)_{i=1}^B$  is either zero or one. To see this, without loss of generality, assume that  $\theta_0 < \theta^*$ .

577 Then, for  $T > T^*(\omega)$ , denoting  $\hat{F}(\cdot)$  as the quantile function on  $\left(\rho(H_t^{(i)})\right)_{i=1}^B$ , for all  $\omega \in \Omega$ ,

$$\hat{F}(\rho(H_T)(\omega)) = \frac{1}{B} \sum_{i=1}^B \mathbf{1}[\rho(H_T)(\omega) \leq \rho(H_T^{(i)})(\omega)] \quad (17)$$

$$= \frac{1}{B} \sum_{i=1}^B \mathbf{1}\left[(\rho(H_T)(\omega) - \theta^*) - (\rho(H_T^{(i)})(\omega) - \theta_0) + \theta^* - \theta_0 \leq 0\right] \quad (18)$$

$$\leq \frac{1}{B} \sum_{i=1}^B \mathbf{1}\left[-\left(\underbrace{|\rho(H_T)(\omega) - \theta^*|}_{< \epsilon^*} + \underbrace{|\rho(H_T^{(i)})(\omega) - \theta_0|}_{< \epsilon^*}\right) + \theta^* - \theta_0 \leq 0\right] \quad (19)$$

$$\leq \frac{1}{B} \sum_{i=1}^B \mathbf{1}\left[-\frac{2(\theta^* - \theta_0)}{3} + (\theta^* - \theta_0) \leq 0\right] \quad (20)$$

$$= \frac{1}{B} \sum_{i=1}^B \mathbf{1}\left[\frac{\theta^* - \theta_0}{3} \leq 0\right] = 0. \quad (21)$$

578 Note that  $\hat{F}$  is bounded between 0 and 1, so  $\hat{F}(\rho(H_T)(\omega))$  must be 0. Line 19 follows from  
 579 the almost sure convergence results discussed previously and the fact that the indicator function  
 580 monotonically increases as the LHS inside the indicator decreases. Line 20 follows by definition  
 581 from the definition of  $\epsilon^*$ . Lastly, our final result follows from our assumption that  $\theta^* > \theta_0$ . Our proof  
 582 proceeds analogously in the case where  $\theta_0 > \theta^*$ , with the end result showing that  $\hat{F}(\rho(H_T)(\omega)) = 1$ .  
 583 As a result, we obtain that for any  $\omega \in \Omega$ , we reject  $\theta_0 \neq \theta^*$  almost surely in Algorithm 2, i.e.

$$\mathbb{P}\left(\omega \in \Omega : \lim_{T \rightarrow \infty} \hat{F}(\rho(H_T)(\omega)) \in \{0, 1\}\right) = 1. \quad (22)$$

## 584 D.2 Proof of Theorem 1

585 We prove the results for Theorem 1 for each case separately, beginning with Example 1. Before  
 586 proceeding, we prove a result regarding the convergence of the variance estimators in Lemma 6.

587 **Lemma 6** (Convergence of Variance Estimates.). *Let Assumption 1 hold, let arm variances be*  
 588 *finite, and let  $\hat{\sigma}_a^2$  be defined as in Theorem 1. Then, our variance estimate is strongly consistent, i.e.*  
 589  $\hat{\sigma}_a^2 \rightarrow_{a.s.} \sigma_a^2$ .

590 *Proof of Lemma 6.* To prove this result, we first expand the variance estimator as follows:

$$\hat{\sigma}_a^2 = \frac{1}{N_T(a)} \sum_{i=1}^T \mathbf{1}[A_t = a] (X_i - \hat{\mu}_T(a))^2 \quad (23)$$

$$= \underbrace{\frac{1}{N_T(a)} \sum_{i=1}^T \mathbf{1}[A_t = a] X_i^2}_{(a)} - \underbrace{\left(\frac{1}{N_T(a)} \sum_{i=1}^T \mathbf{1}[A_t = a] X_i\right)^2}_{(b)} \quad (24)$$

591 We now show that  $(a) \rightarrow_P (\mu_a^*)^2 + (\sigma_a^*)^2$  and  $(b) \rightarrow_P (\mu_a^*)^2$ .

592 For term (b), note that by Assumption 1 and Lemma 3,  $\left(\frac{1}{N_T(a)} \sum_{i=1}^T \mathbf{1}[A_t = a] X_i\right) \rightarrow_{a.s.} \mu_a^*$ . By  
 593 the continuous mapping theorem,  $(b) \rightarrow_{a.s.} (\mu_a^*)^2$ .

594 For term (a), we can further decompose the estimate as follows:

$$(a) = \frac{1}{N_T(a)} \sum_{i=1}^T \mathbf{1}[A_t = a] (X_i - \mu_a^* + \mu_a^*)^2 \quad (25)$$

$$= \underbrace{\frac{1}{N_T(a)} \sum_{i=1}^T \mathbf{1}[A_t = a] (X_i - \mu_a^*)^2}_{(i)} + \underbrace{\frac{1}{N_T(a)} \sum_{i=1}^T \mathbf{1}[A_t = a] 2(X_i - \mu_a^*)(\mu_a^*) + (\mu_a^*)^2}_{(ii)} \quad (26)$$

595 Term (i) converges almost surely to  $(\sigma_a^*)^2$  by definition of variance, the strong law of large numbers,  
 596 and Lemma 3. Term (ii) converges to 0 almost surely due to the fact that  $\frac{1}{N_T(a)} \sum_{i=1}^T \mathbf{1}[A_t =$   
 597  $a](X_i - \mu_a^*) \rightarrow_{a.s.} 0$ . As a result, we obtain  $(a) \rightarrow_{a.s.} (\sigma_a^*)^2 + (\mu_a^*)^2$ .

598 Putting the convergence results of (a) and (b) together, we obtain that  $\hat{\sigma}_a^2 \rightarrow_{a.s.} (\sigma_a^*)^2$ .  $\square$

### 599 D.2.1 Proof for Example 1

600 We focus on two distinct cases: (i)  $\mu_1^* \neq \mu_2^*$ , and (ii)  $\mu_1^* = \mu_2^*$ . Let  $\sigma_1^*, \sigma_2^*$  denote the true standard  
 601 deviations of arm 1 and 2 respectively.

602 **Analysis of Case (i)** We first characterize the distribution of the observed sample mean test statistic  
 603 under the ETC design for Case (i), keeping the true arm distributions  $P_1, P_2$  fixed. The observed  
 604 sample mean test statistic  $\rho(H_T)$  converges to the following distribution:

$$\lim_{T \rightarrow \infty} \sqrt{T} \frac{(\rho(H_T) - \theta^*)}{\hat{\sigma}_1} \rightarrow_d \frac{2Z_1 + (\mathbf{1}[\mu_1^* \geq \mu_2^*]) 2\sqrt{2}Z_2}{1 + 2(\mathbf{1}[\mu_1^* \geq \mu_2^*])} \quad (27)$$

605 where  $Z_i$  denotes a standard normal random variable. The standard normal random variables are a  
 606 direct consequence of Slutsky's lemma using the central limit theorem and  $\hat{\sigma}_1 \rightarrow_P \sigma_1^*$  (shown  
 607 in Lemma 6). The indicator term  $\mathbf{1}[\mu_1^* \geq \mu_2^*]$  denotes the commit stage, where arm 1 is sampled  
 608  $T/2$  additional times beyond the exploration stage. Because we assume  $\mu_1 \neq \mu_2$ , the indicator  
 609 function  $\mathbf{1}[\hat{\mu}_{T/2}(1) \geq \hat{\mu}_{T/2}(2)]$  converges to  $\mathbf{1}[\mu_1^* \geq \mu_2^*]$  almost surely. This follows from the fact  
 610 that  $\mathbb{P}(\omega \in \Omega : \lim_{T \rightarrow \infty} \mathbf{1}[\hat{\mu}_{T/2}(1)(\omega) \geq \hat{\mu}_{T/2}(2)(\omega)] \neq \mathbf{1}[\mu_1^* \geq \mu_2^*]) = 0$  by the SLLN.

611 We now show that for every sample path  $\omega \in \Omega$ , the simulated distributions of  $\rho(H_T^{(i)})$  uniformly  
 612 protect type I error for  $\theta_0 = \theta^*$ . To show this, note that the distribution of the simulated test statistic  
 613  $\rho(H_T^{(i)})(\omega)$ , depends on the plug-in estimate  $\hat{\mu}_2(\omega)$  used in the simulation.

614 We first note that the bias condition on  $\epsilon_a$  in Theorem 1 states that  $\sqrt{\frac{\log \log N_T(2)}{N_T(2)}} / \epsilon_a \rightarrow 0$ . Under  
 615 Assumption 1,  $N_T(2) \rightarrow \infty$  almost surely (a.s.), so this condition permits two regimes: setting  $\epsilon_a$   
 616 such that (a) bias term  $\epsilon_a$  converges a.s. to zero, and (b) bias term  $\epsilon_a$  does not converge a.s. to zero.

617 In setting (a), such as when  $\epsilon_a = \frac{\log \log N_T(a)}{\sqrt{N_T(a)}}$ , the test statistic  $\rho(H_T^{(i)})(\omega)$  converges in distribution  
 618 to RHS of Equation 27, matching the distribution of the true test statistic  $\rho(H_T)$ . This follows  
 619 directly from the Slutsky's lemma, now including a vanishing term  $\epsilon_a \rightarrow_{a.s.} 0$ . As  $B \rightarrow \infty$ , the  
 620 Glivenko-Cantelli theorem [26] ensures that the simulated distribution converges to that of the true  
 621 distribution, ensuring type I error guarantees.

622 In setting (b), such as when  $\epsilon_a$  is a positive constant, the simulated distribution  $\rho(H_T^{(i)})$  for sample  
 623 path  $\omega \in \Omega$  takes the form in Equation 28. Note that our convergence in distribution denotes  
 624 convergence of the simulated distribution (over the randomness generated by Algorithm 1) for a fixed  
 625 sample path  $\omega \in \Omega$  as  $T \rightarrow \infty$ .

$$\lim_{T \rightarrow \infty} \sqrt{T} \frac{(\rho(H_T^{(i)})(\omega) - \theta^*)}{\hat{\sigma}_1(\omega)} \rightarrow_d \frac{2Z_1 + (\mathbf{1}[\mu_1^* \geq \mu_2^* + \epsilon_2(\omega)]) 2\sqrt{2}Z_2}{1 + 2(\mathbf{1}[\mu_1^* \geq \mu_2^* + \epsilon_2(\omega)])}. \quad (28)$$

626 We now examine the limiting behavior of  $\epsilon_2(\omega)$  as  $T \rightarrow \infty$ . If  $\epsilon_2(\omega) < |\mu_1^* - \mu_2^*|$  as  $T \rightarrow \infty$ , then  
 627 we obtain the same distribution as the RHS in Equation 27. If  $\epsilon_2(\omega) \geq |\mu_1^* - \mu_2^*|$  as  $T \rightarrow \infty$ , then  
 628 the distribution of  $\rho(H_T^{(i)})$  still provides valid type I error guarantees.

629 To show this, consider the case where  $\mu_1^* < \mu_2^*$ . If  $\epsilon_2(\omega) \geq \mu_2^* - \mu_1^*$ , then the distribution of the  
630 observed test statistic  $\rho(H_T)$  and sample-path dependent simulated distribution  $\rho(H_T^{(i)})(\omega)$  match in  
631 distribution due to  $\mathbf{1}[\mu_1^* \geq \mu_2^* + \epsilon_2(\omega)] = \mathbf{1}[\mu_1^* \geq \mu_2^*]$ . In the case where  $\mu_1^* > \mu_2^*$ , if  $\epsilon_2(\omega) \geq \mu_1^* - \mu_2^*$ ,  
632 the distribution of the observed test statistic obtains the limiting distribution

$$\lim_{T \rightarrow \infty} \sqrt{T} \frac{(\rho(H_T) - \theta^*)}{\hat{\sigma}_1} \rightarrow_d \frac{2Z_1 + 2\sqrt{2}Z_2}{3} =_d \frac{2Z_3}{\sqrt{3}}, \quad (29)$$

633 whereas the simulated test statistic distribution  $\rho(H_T^{(i)})(\omega)$  for sample path  $\omega \in \Omega$  takes the form

$$\lim_{T \rightarrow \infty} \sqrt{T} \frac{(\rho(H_T^{(i)})(\omega) - \theta^*)}{\hat{\sigma}_1(\omega)} \rightarrow_d 2Z_1 \quad \forall \omega \in \Omega. \quad (30)$$

634 The observed test statistic has a tighter limiting distribution around  $\theta^*$  than our simulated test statistic,  
635 resulting in valid type I error control. By the Glivenko-Cantelli theorem [26] for uniform almost  
636 sure convergence for the empirical CDF (applied to the number of simulations  $B$ ), we obtain the  
637 following result, where  $\mu$  is a dominating measure for the test statistic  $\rho(H_T^{(i)})$ .

$$\lim_{T \rightarrow \infty} \lim_{B \rightarrow \infty} \mathbb{P} \left( \left\{ \hat{F}(\rho(H_T)) \geq 1 - \alpha/2 \right\} \cup \left\{ \hat{F}(\rho(H_T)) \leq 1 - \alpha/2 \right\} \right) \quad (31)$$

$$= \lim_{T \rightarrow \infty} \mathbb{P} \left( \mathbf{1} \left[ \int \mathbf{1} [\rho(H_T) \geq \rho(H_T^{(i)})] \in [0, \alpha/2] \cup [1 - \alpha/2, 1] \right] d_\mu(\rho(H_T^{(i)})) \right) \quad (32)$$

$$\leq \lim_{T \rightarrow \infty} \mathbb{P} \left( \mathbf{1} \left[ \int \mathbf{1} [\rho(H_T) \geq \rho(H_T^{(i)})] \in [0, \alpha/2] \right] d_\mu(\rho(H_T^{(i)})) \right) \quad (33)$$

$$+ \lim_{T \rightarrow \infty} \mathbb{P} \left( \mathbf{1} \left[ \int \mathbf{1} [\rho(H_T) \geq \rho(H_T^{(i)})] \in [1 - \alpha/2, 1] \right] d_\mu(\rho(H_T^{(i)})) \right) \quad (34)$$

$$= \Phi \left( \sqrt{3}\Phi^{-1}(\alpha/2) \right) + \left( 1 - \Phi \left( \sqrt{3}\Phi^{-1}(\alpha/2) \right) \right) \quad (35)$$

$$\leq \alpha/2 + \alpha/2 = \alpha, \quad (36)$$

638 where  $\Phi(\cdot)$  and  $\Phi^{-1}(\cdot)$  denote the CDF and quantile function of a standard random normal variable.  
639 Line 32 follows from the Glivenko-Cantelli theorem as  $B \rightarrow \infty$  and the dominated convergence  
640 theorem applied to our indicator functions in order to move the limits within the outer probability  
641 integral. The inequality in line 34 follows from a simple union bound. Line 35 is a direct consequence  
642 of the limiting results in equations (29) and (30). Finally, line 36 follows from the fact that (i)  
643  $\Phi(\Phi^{-1}(\alpha/2)) = \alpha/2$ , (ii)  $\Phi(\cdot)$  is a monotone function, and (iii)  $\sqrt{3}\Phi^{-1}(\alpha/2) \leq \Phi^{-1}(\alpha/2)$ . This  
644 finishes the proof in the case where  $\mu_1^* \neq \mu_2^*$ .

645 **Analysis of Case (ii)** When  $\mu_1^* = \mu_2^*$ , the decision for the commit stage is nondeterministic,  
646 resulting in the distribution of the observed test statistic  $\rho(H_T)$  taking the following form:

$$\lim_{T \rightarrow \infty} \sqrt{T} \frac{(\rho(H_T) - \theta^*)}{\hat{\sigma}_1} \rightarrow_d \frac{2Z_1 + (\mathbf{1}[\sigma_1^* Z_1 \geq \sigma_2^* Z_3]) 2\sqrt{2}Z_2}{1 + 2(\mathbf{1}[\sigma_1^* Z_1 \geq \sigma_2^* Z_3])}. \quad (37)$$

647 This result follows from similar arguments to the section above, but because  $\mu_1^* = \mu_2^*$ , we are left  
648 with only noise scaled by the standard deviations of each arm.

649 We now provide the limiting distribution for the simulated test statistic  $\rho(H_T^{(i)})$  for all sample paths  
650  $\omega \in \Omega$ . For a given sample path  $\omega \in \Omega$ , the limiting distribution takes the form

$$\lim_{T \rightarrow \infty} \sqrt{T} \frac{(\rho(H_T^{(i)})(\omega) - \theta^*)}{\hat{\sigma}_1(\omega)} \rightarrow_d 2Z_1 \quad \forall \omega \in \Omega. \quad (38)$$

651 We prove the result of Equation 38 below. This result is a direct consequence of our additional bias  
652 term  $\epsilon_a$ , which satisfies the condition  $\left( \frac{\log \log N_T(a)}{N_T(a)} \right) / \epsilon_a \rightarrow 0$ . At time  $T/2$  in our simulation, we  
653 decide the arm 1 to sample an additional  $T/2$  times based on the following indicator function (where

654 1 implies that we sample arm 1  $T/2$  additional times):

$$\mathbf{1} \left[ \mu_1^*(\omega) + \frac{\hat{\sigma}_1(\omega)}{\sqrt{T/4}} Z_1 \geq \hat{\mu}_T(2)(\omega) + \epsilon_2(\omega) + \frac{\hat{\sigma}_2(\omega)}{\sqrt{T/4}} Z_2 \right] \quad (39)$$

$$= \mathbf{1} \left[ \sqrt{T} (\mu_1^* - \hat{\mu}_T(2)(\omega)) + 2\hat{\sigma}_1(\omega) Z_1 - 2\hat{\sigma}_2(\omega) \geq \sqrt{T} \epsilon_2(\omega) \right] \quad (40)$$

$$= \mathbf{1} \left[ \underbrace{\sqrt{\frac{T}{N_T(2)(\omega)}} \frac{\sqrt{N_T(2)(\omega)} (\mu_1^* - \hat{\mu}_T(2)(\omega))}{\sqrt{\log \log N_T(2)(\omega)}}}_{(a)} + \underbrace{\frac{2\hat{\sigma}_1(\omega) Z_1 - 2\hat{\sigma}_2(\omega)}{\sqrt{\log \log N_T(2)(\omega)}}}_{(b)} \geq \right] \quad (41)$$

$$\underbrace{\sqrt{\frac{T}{N_T(2)(\omega)}} \frac{\epsilon_2(\omega)}{\sqrt{\frac{\log \log N_T(2)(\omega)}{N_T(2)(\omega)}}}}_{(c)}. \quad (42)$$

655 We analyze the limits of terms (a), (b), and (c) below.

656 For term (a), we upper bound its limiting value and show that it must be finite. Note that  $\frac{T}{N_T(2)(\omega)} \leq 2$   
657 for all  $\omega \in \Omega$ , and  $\lim_{T \rightarrow \infty} \frac{\sqrt{N_T(2)(\omega)}}{\sqrt{\log \log N_T(2)(\omega)}} |\mu_1^* - \hat{\mu}_T(2)(\omega)| \leq \sigma_2^* \sqrt{2}$  for all  $\omega \in \Omega$  by Lemmas 3  
658 and 4 and the assumption that  $\mu_1^* = \mu_2^*$ . Because we assume  $\sigma_2^* < \infty$ , term (a) is upper bounded by  
659 the constant  $\sigma_2^* \sqrt{2}$ . For term (b), note that  $\hat{\sigma}_1(\omega) \rightarrow \sigma_1^*$  and  $\hat{\sigma}_2(\omega) \rightarrow \sigma_2^*$  for all  $\omega \in \Omega$ , meaning that  
660 the scalar values in the numerator are finite. Because  $N_T(2)(\omega) \rightarrow \infty$  for all  $\omega \in \Omega$ , term (b)  $\rightarrow 0$   
661 for all  $\omega \in \Omega$ . Lastly, for term (c), we use the condition that  $\left( \epsilon_2(\omega) / \left( \sqrt{\frac{\log \log N_T(2)(\omega)}{N_T(2)(\omega)}} \right) \right)^{-1} \rightarrow 0$   
662 for all  $\omega \in \Omega$ , which implies that (c) diverges to infinity. As a result, (c)  $\rightarrow \infty$  almost surely.

663 Putting these pieces together, we obtain that our indicator function is equal to 0 as  $T \rightarrow \infty$  for all  
664 sample paths  $\omega \in \Omega$ . As a result, we obtain as  $T \rightarrow \infty$ , for all realized sample paths  $\omega \in \Omega$ , our  
665 simulated sample paths select arm 2 as the arm to sample an additional  $T/2$  times, resulting in the  
666 distribution provided in Equation 38.

667 We now show that the CDF of our simulated test statistic provides valid type I error control. To do  
668 so, we first note that the quantiles of the limiting distribution in Equation (37) are less extreme than  
669 the quantiles of the limiting distribution Equation (38). To see this, note that  $\frac{2Z_1 + \mathbf{1}[Z_1 \geq c] 2\sqrt{2}Z_2}{1 + 2\mathbf{1}[Z_1 \geq c]}$  has  
670 less extreme quantiles than  $2Z_1$  for all values of  $c$ , and therefore even with  $c \sim_d \frac{\sigma_2^*}{\sigma_1^*} Z_3$ , our limiting  
671 distribution in Equation (38) retains more extreme quantiles. Then, we follow the same steps as lines  
672 (31) through (36) (replacing the standard outer normals with our nonstandard distribution in Equation  
673 (37)) to obtain our desired type I error guarantees.

674 **Proof for Example 2** We prove this result by first leveraging stability results for UCB presented by  
675 Khamaru and Zhang [15]. For completeness, we provide this result below in Lemma 7

676 **Lemma 7** (Theorem 3.1 of Khamaru and Zhang [15]). *Denote  $\Delta_a = (\max_{a \in [K]} \mu_a^* - \mu_a^*)$ , and*  
677 *assume that the following conditions hold:*

- 678 (i)  $0 \leq \Delta_a / \sqrt{2 \log T} = o(1)$  for all  $a \in [K]$ ,
- 679 (ii)  $P_a$  is  $\lambda_a$ -subgaussian for all arms  $a \in [K]$ , where  $|\lambda_a| \leq B$  for some constant  $B$ .

680 Then,  $\frac{N_T(a)}{(1/\sqrt{N^*} + \sqrt{\Delta_a^2/2 \log T})^{-2}} \rightarrow_p 1$ , where  $N^*$  is defined as the unique solution to the following:

$$\sum_{a \in [K]} \frac{1}{\left( \sqrt{T/N^*} + \sqrt{T \Delta_a^2/2 \log T} \right)^2} = 1. \quad (43)$$

681 We show that under our simulation procedure, for all possible experiment sample paths  $\omega \in \Omega$ , the  
682 number of samples  $N_T(1)(\omega)$  converges in probability to a smaller limiting value than under the true  
683 vector of means  $\mu^*$ , resulting in larger upper (and smaller lower) quantiles using Lemma 5.

By Corollary 1, there exists a  $T(\omega)$  for all  $\omega \in \Omega$  such that  $\hat{\mu}_a(\omega) \geq \mu_a^*$  for all  $a \neq 1$ . Let  $\hat{\Delta}_a(\omega) = \max\{\theta^*, \max_{a' \in [K] \setminus \{1\}} \hat{\mu}_T(a')(\omega) + \epsilon_a(\omega)\} - \mathbf{1}[a \neq 1] (\hat{\mu}_T(a') + \epsilon_a(\omega)) - \mathbf{1}[a = 1]\theta^*$ , and let  $\Delta_a$  denote the ground truth equivalent with respect to true mean vector  $\mu^*$ . By Lemma 7, we obtain that the number of arm pulls  $N_T(1)(\omega)$  under simulations of  $\rho(H_T^{(i)})$  satisfies the following limit:

$$\frac{N_T(1)(\omega)}{\left(1/\sqrt{N^*(\omega)} + \sqrt{\hat{\Delta}_a^2(\omega)/2 \log T}\right)^{-2}} \rightarrow_p 1, \quad \sum_{a \in [K]} \frac{1}{\left(\sqrt{T/N^*(\omega)} + \sqrt{T\hat{\Delta}_a^2/2 \log T}\right)^2} = 1. \quad (44)$$

Because  $\liminf_{T \rightarrow \infty} \hat{\mu}_a(\omega) \geq \mu_a^*$  for all  $a \neq 1$  and  $\omega \in \Omega$ ,  $\limsup_{T \rightarrow \infty} \frac{(1/\sqrt{N^*(\omega)} + \sqrt{\hat{\Delta}_a^2(\omega)/2 \log T})^{-2}}{(1/\sqrt{N^*} + \sqrt{\Delta_a^2/2 \log T})^{-2}} \leq 1$  for all  $\omega \in \Omega$ , where  $N^*$  is as defined in

Lemma 7. As a result, for each  $\omega \in \Omega$ , (i)  $\frac{N_T(1)(\omega)}{(1/\sqrt{N^*(\omega)} + \sqrt{\hat{\Delta}_a^2(\omega)/2 \log T})^{-2}} \rightarrow_p 1$ , and (ii)  $\limsup_{\omega \in \Omega, T \rightarrow \infty} N_T(1)(\omega) / \left(1/\sqrt{N^*} + \sqrt{\Delta_a^2/2 \log T}\right)^{-2} \leq 1$ . This implies that for each simulation under  $\omega$ , the distribution of  $\rho(H_T^{(i)})(\omega)$  is asymptotically normal and centered at  $\mu_1^*$ , but has larger limiting variance than  $\rho(H_T^{(i)})$ . By the same argument (i.e. for all  $\omega \in \Omega$ , larger  $1 - \alpha/2$  quantiles, smaller  $\alpha/2$  quantiles for  $\rho(H_T^{(i)})(\omega)$ ) as case (ii) in Example 1, we preserve type I error.

**Proof for Example 3** Example 3 proceeds similarly Example 2. First, we show that under this design, the test statistic  $\rho(H_T)$  is asymptotically normal. Second, we show that simulated distribution of  $\rho(H_T^{(i)})(\omega)$  has wider quantiles as a result of (i) lower limiting sampling rates and (ii) an asymptotically normal distribution for all  $\omega \in \Omega$ .

First, let  $a^* = \operatorname{argmax}_{a \in [K]} \mu_a^*$ , where  $a^*$  is assumed to be unique by definition. For all arms  $a \neq a^*$ , note that  $\frac{N_T(a)}{T\gamma/K} \rightarrow_p 1$ , and for  $a = a^*$ ,  $\frac{N_T(a)}{T(1-\gamma) + T\gamma/K} \rightarrow_p 1$ . This follows from the fact that we assume suboptimal arms are selected at a smaller rate than  $c/T$  for some constant  $c$  at each timestep, resulting in

$$\limsup_{T \rightarrow \infty} \frac{N_T(a)}{T} \leq \lim_{T \rightarrow \infty} \frac{\gamma T/K + c \log(T)}{T} \rightarrow_p \gamma/K \quad \forall a \neq a^*. \quad (45)$$

Likewise, an equivalent lower bound for the leftmost expression above is obtained by ignoring all samples of arm  $a$  that are not obtained through forced exploration with probability  $\gamma$ . We obtain the expression for  $a = a^*$  by noting that  $\sum_{a \in [K]} \frac{N_T(a)}{T} = 1$  by definition. Given that the number of arm pulls converge to a constant (dependent on sample path) in probability, Lemma 5 states that  $\sqrt{N_T(1)}\rho(H_T)/\hat{\sigma}_1 \rightarrow_d N(0, 1)$ . With positive bias term  $\epsilon_a$  added to all other means, if  $\epsilon_a \rightarrow 0$  as  $T \rightarrow \infty$ , then the best arm does not change, and therefore the limiting distribution for  $\rho(H_T^{(i)})$  and the limiting distribution for observed test statistic  $\rho(H_T)$  are identical, and therefore we preserve type I error. If  $\lim_{T \rightarrow \infty} \epsilon_a > 0$ , then note that the only change in distribution may be that arm 1 goes from the best arm under  $\mu^*$  to a suboptimal arm under estimated nuisances  $\hat{\mu} = [\theta^*, \hat{\mu}_2, \dots, \hat{\mu}_K]$ . If this change does occur, then the simulated distribution  $\rho(H_T^{(i)})$  has larger  $1 - \alpha/2$  quantiles and smaller  $\alpha/2$  quantiles as  $T, B \rightarrow \infty$  due to (i) a centered normal distribution where (ii) standard deviations scale with the number of arm pulls. By the same argument as case (ii) in Example 1, we preserve type I error.

### D.3 Proof of Lemma 2

Before showing the proof of this approach, we first note a minor clarification that will be added to the main body in Remark 5. We assume the change in Remark 5 in our proof.

**Remark 5.** Lemma 2 assumes that  $\hat{C}(\alpha)$  is not the empty set almost surely - we will make this explicit in the next possible edit by modifying  $\hat{C}(\alpha)$  to always include the empirical mean estimate  $\hat{\mu}_T(1)$ .

722 The proof of Lemma 2 follows directly from Lemma 1. We prove this result using proof by  
 723 contradiction, showing that the upper and lower bounds of our confidence set must converge to  $\theta^*$   
 724 almost surely. To begin, we start with the lower bound  $\hat{L}(\alpha) = \min\{\theta : \theta \in \hat{C}(\alpha)\}$ .

725 To contradict  $\hat{L}(\alpha) \rightarrow_{a.s.} \theta^*$ , we assume that there exists a sample path  $\omega \in \Omega$  (where  $\mathbb{P}(\Omega) = 1$ )  
 726 and  $\epsilon > 0$ , such that  $\lim_{T \rightarrow \infty} |\hat{L}(\alpha)(\omega) - \theta^*| > \epsilon$ . However, by Lemma 1, for all  $\omega \in \Omega$ , there  
 727 exists a  $T(\omega)$  such that for  $\hat{L}(\alpha)(\omega) \neq \theta^*$ ,  $\hat{F}(\rho(H_T)(\omega)) \in \{0, 1\}$  for all  $T > T(\omega)$ , meaning that  
 728  $\hat{L}(\alpha)(\omega) \notin \hat{C}(\alpha)$  by definition in Algorithm 2. This results in a contradiction, demonstrating that  
 729  $\hat{L}(\alpha) \rightarrow_{a.s.} \theta^*$ . We repeat this proof for  $\hat{U}(\alpha) = \max\{\theta : \theta \in \hat{C}(\alpha)\}$  to obtain analogous results,  
 730 proving that  $\hat{C}(\alpha) \rightarrow_{a.s.} \{\theta^*\}$ . Because  $\hat{\theta} \in \hat{C}(\alpha)$  and  $\hat{C}(\alpha) \rightarrow_{a.s.} \{\theta^*\}$ , we obtain  $\hat{\theta} \rightarrow_{a.s.} \theta^*$ .

## 731 E Limitations and Broader Impacts

732 **Limitations** The key limitation of this approach is that (i) there exists minimal unifying theory on  
 733 what/which designs this approach provides valid type I error and (ii) its relatively high computational  
 734 expense compared with standard inference approaches. As shown in Appendix D, for each example  
 735 in Theorem 1, we verify the examples on a case-by-case basis. It would be of great interest to have a  
 736 unifying condition on designs and arm instances under which this approach provides valid inference.  
 737 Furthermore, our approach, while maintaining a reasonable level of computational tractability relative  
 738 to the grid-scanning approach discussed in Section 3, is far more expensive than methods such as a  
 739 Wald confidence interval. Thus, our approach is best suited for settings where experiment horizons  
 740 are moderate and one wishes to conduct inference on treatments/arms not specifically targeted by  
 741 the design. Our approach provides the largest gains for target parameters not targeted by the design  
 742 (e.g. arms with relatively low means), and should be used in settings where inference on all options  
 743 offered throughout the experiment is desired/necessary.

744 **Broader Impacts** Our work contributes to the literature on inference post adaptive experimentation,  
 745 and is among the few works (to the best of our knowledge) that aims to use a computational approach  
 746 to conduct inference in this setting. Much like how bootstrap approaches generally tend to outperform  
 747 asymptotic or finite-sample inference based on Gaussian approximations or concentration inequalities,  
 748 our empirical results suggest our simulation-based approach may improve power and reduce  
 749 confidence interval widths for many classical settings. Furthermore, our work relaxes conditions  
 750 such as conditional positivity, while maintaining asymptotic control of type I error. We note that  
 751 our guarantees on error rates is asymptotic, and therefore caution practitioners who hope to use our  
 752 approach when sample sizes are overly small.

## NeurIPS Paper Checklist

### 1. Claims

Question: Do the main claims made in the abstract and introduction accurately reflect the paper's contributions and scope?

Answer: [\[Yes\]](#)

Justification: All claims made are justified by the theoretical/empirical results provided in the paper. We provide additional robustness checks for these claims in Appendix C.

Guidelines:

- The answer NA means that the abstract and introduction do not include the claims made in the paper.
- The abstract and/or introduction should clearly state the claims made, including the contributions made in the paper and important assumptions and limitations. A No or NA answer to this question will not be perceived well by the reviewers.
- The claims made should match theoretical and experimental results, and reflect how much the results can be expected to generalize to other settings.
- It is fine to include aspirational goals as motivation as long as it is clear that these goals are not attained by the paper.

### 2. Limitations

Question: Does the paper discuss the limitations of the work performed by the authors?

Answer: [\[Yes\]](#)

Justification: We discuss the limitations of this work in Appendix E.

Guidelines:

- The answer NA means that the paper has no limitation while the answer No means that the paper has limitations, but those are not discussed in the paper.
- The authors are encouraged to create a separate "Limitations" section in their paper.
- The paper should point out any strong assumptions and how robust the results are to violations of these assumptions (e.g., independence assumptions, noiseless settings, model well-specification, asymptotic approximations only holding locally). The authors should reflect on how these assumptions might be violated in practice and what the implications would be.
- The authors should reflect on the scope of the claims made, e.g., if the approach was only tested on a few datasets or with a few runs. In general, empirical results often depend on implicit assumptions, which should be articulated.
- The authors should reflect on the factors that influence the performance of the approach. For example, a facial recognition algorithm may perform poorly when image resolution is low or images are taken in low lighting. Or a speech-to-text system might not be used reliably to provide closed captions for online lectures because it fails to handle technical jargon.
- The authors should discuss the computational efficiency of the proposed algorithms and how they scale with dataset size.
- If applicable, the authors should discuss possible limitations of their approach to address problems of privacy and fairness.
- While the authors might fear that complete honesty about limitations might be used by reviewers as grounds for rejection, a worse outcome might be that reviewers discover limitations that aren't acknowledged in the paper. The authors should use their best judgment and recognize that individual actions in favor of transparency play an important role in developing norms that preserve the integrity of the community. Reviewers will be specifically instructed to not penalize honesty concerning limitations.

### 3. Theory assumptions and proofs

Question: For each theoretical result, does the paper provide the full set of assumptions and a complete (and correct) proof?

Answer: [\[Yes\]](#)



Justification: For all theoretical results (Theorem 1, Lemmas 2 and 1), we provide intuition and proof sketches in the main body, and formal proofs in Appendix D. Assumptions are stated.

Guidelines:

- The answer NA means that the paper does not include theoretical results.
- All the theorems, formulas, and proofs in the paper should be numbered and cross-referenced.
- All assumptions should be clearly stated or referenced in the statement of any theorems.
- The proofs can either appear in the main paper or the supplemental material, but if they appear in the supplemental material, the authors are encouraged to provide a short proof sketch to provide intuition.
- Inversely, any informal proof provided in the core of the paper should be complemented by formal proofs provided in appendix or supplemental material.
- Theorems and Lemmas that the proof relies upon should be properly referenced.

#### 4. Experimental result reproducibility

Question: Does the paper fully disclose all the information needed to reproduce the main experimental results of the paper to the extent that it affects the main claims and/or conclusions of the paper (regardless of whether the code and data are provided or not)?

Answer: [\[Yes\]](#)

Justification: The paper provides all such details in Section 4 and Appendix C.

Guidelines:

- The answer NA means that the paper does not include experiments.
- If the paper includes experiments, a No answer to this question will not be perceived well by the reviewers: Making the paper reproducible is important, regardless of whether the code and data are provided or not.
- If the contribution is a dataset and/or model, the authors should describe the steps taken to make their results reproducible or verifiable.
- Depending on the contribution, reproducibility can be accomplished in various ways. For example, if the contribution is a novel architecture, describing the architecture fully might suffice, or if the contribution is a specific model and empirical evaluation, it may be necessary to either make it possible for others to replicate the model with the same dataset, or provide access to the model. In general, releasing code and data is often one good way to accomplish this, but reproducibility can also be provided via detailed instructions for how to replicate the results, access to a hosted model (e.g., in the case of a large language model), releasing of a model checkpoint, or other means that are appropriate to the research performed.
- While NeurIPS does not require releasing code, the conference does require all submissions to provide some reasonable avenue for reproducibility, which may depend on the nature of the contribution. For example
  - (a) If the contribution is primarily a new algorithm, the paper should make it clear how to reproduce that algorithm.
  - (b) If the contribution is primarily a new model architecture, the paper should describe the architecture clearly and fully.
  - (c) If the contribution is a new model (e.g., a large language model), then there should either be a way to access this model for reproducing the results or a way to reproduce the model (e.g., with an open-source dataset or instructions for how to construct the dataset).
  - (d) We recognize that reproducibility may be tricky in some cases, in which case authors are welcome to describe the particular way they provide for reproducibility. In the case of closed-source models, it may be that access to the model is limited in some way (e.g., to registered users), but it should be possible for other researchers to have some path to reproducing or verifying the results.

#### 5. Open access to data and code

Question: Does the paper provide open access to the data and code, with sufficient instructions to faithfully reproduce the main experimental results, as described in supplemental material?

Answer: [Yes]

Justification: All code necessary to run the experiment is provided in the supplementary material. We provide documentation for hyperparameters and related details in Appendix C and Section 4.

Guidelines:

- The answer NA means that paper does not include experiments requiring code.
- Please see the NeurIPS code and data submission guidelines (<https://nips.cc/public/guides/CodeSubmissionPolicy>) for more details.
- While we encourage the release of code and data, we understand that this might not be possible, so “No” is an acceptable answer. Papers cannot be rejected simply for not including code, unless this is central to the contribution (e.g., for a new open-source benchmark).
- The instructions should contain the exact command and environment needed to run to reproduce the results. See the NeurIPS code and data submission guidelines (<https://nips.cc/public/guides/CodeSubmissionPolicy>) for more details.
- The authors should provide instructions on data access and preparation, including how to access the raw data, preprocessed data, intermediate data, and generated data, etc.
- The authors should provide scripts to reproduce all experimental results for the new proposed method and baselines. If only a subset of experiments are reproducible, they should state which ones are omitted from the script and why.
- At submission time, to preserve anonymity, the authors should release anonymized versions (if applicable).
- Providing as much information as possible in supplemental material (appended to the paper) is recommended, but including URLs to data and code is permitted.

## 6. Experimental setting/details

Question: Does the paper specify all the training and test details (e.g., data splits, hyperparameters, how they were chosen, type of optimizer, etc.) necessary to understand the results?

Answer: [Yes]

Justification: The paper provides all such details in Section 4 and Appendix C.

Guidelines:

- The answer NA means that the paper does not include experiments.
- The experimental setting should be presented in the core of the paper to a level of detail that is necessary to appreciate the results and make sense of them.
- The full details can be provided either with the code, in appendix, or as supplemental material.

## 7. Experiment statistical significance

Question: Does the paper report error bars suitably and correctly defined or other appropriate information about the statistical significance of the experiments?

Answer: [Yes]

Justification: All figures presented in this paper have error bars (even if hard to see).

Guidelines:

- The answer NA means that the paper does not include experiments.
- The authors should answer "Yes" if the results are accompanied by error bars, confidence intervals, or statistical significance tests, at least for the experiments that support the main claims of the paper.
- The factors of variability that the error bars are capturing should be clearly stated (for example, train/test split, initialization, random drawing of some parameter, or overall run with given experimental conditions).

- The method for calculating the error bars should be explained (closed form formula, call to a library function, bootstrap, etc.)
- The assumptions made should be given (e.g., Normally distributed errors).
- It should be clear whether the error bar is the standard deviation or the standard error of the mean.
- It is OK to report 1-sigma error bars, but one should state it. The authors should preferably report a 2-sigma error bar than state that they have a 96% CI, if the hypothesis of Normality of errors is not verified.
- For asymmetric distributions, the authors should be careful not to show in tables or figures symmetric error bars that would yield results that are out of range (e.g. negative error rates).
- If error bars are reported in tables or plots, The authors should explain in the text how they were calculated and reference the corresponding figures or tables in the text.

## 8. Experiments compute resources

Question: For each experiment, does the paper provide sufficient information on the computer resources (type of compute workers, memory, time of execution) needed to reproduce the experiments?

Answer: [Yes]

Justification: All such details are provided in Appendix C of this paper.

Guidelines:

- The answer NA means that the paper does not include experiments.
- The paper should indicate the type of compute workers CPU or GPU, internal cluster, or cloud provider, including relevant memory and storage.
- The paper should provide the amount of compute required for each of the individual experimental runs as well as estimate the total compute.
- The paper should disclose whether the full research project required more compute than the experiments reported in the paper (e.g., preliminary or failed experiments that didn't make it into the paper).

## 9. Code of ethics

Question: Does the research conducted in the paper conform, in every respect, with the NeurIPS Code of Ethics <https://neurips.cc/public/EthicsGuidelines>?

Answer: [Yes]

Justification: Our research takes into account the following factors (if relevant): potential harms caused by the research process, societal impact and potential harmful consequences, and impact mitigation measures.

Guidelines:

- The answer NA means that the authors have not reviewed the NeurIPS Code of Ethics.
- If the authors answer No, they should explain the special circumstances that require a deviation from the Code of Ethics.
- The authors should make sure to preserve anonymity (e.g., if there is a special consideration due to laws or regulations in their jurisdiction).

## 10. Broader impacts

Question: Does the paper discuss both potential positive societal impacts and negative societal impacts of the work performed?

Answer: [Yes]

Justification: We discuss broader impacts of our work in Appendix E.

Guidelines:

- The answer NA means that there is no societal impact of the work performed.
- If the authors answer NA or No, they should explain why their work has no societal impact or why the paper does not address societal impact.

- Examples of negative societal impacts include potential malicious or unintended uses (e.g., disinformation, generating fake profiles, surveillance), fairness considerations (e.g., deployment of technologies that could make decisions that unfairly impact specific groups), privacy considerations, and security considerations.
- The conference expects that many papers will be foundational research and not tied to particular applications, let alone deployments. However, if there is a direct path to any negative applications, the authors should point it out. For example, it is legitimate to point out that an improvement in the quality of generative models could be used to generate deepfakes for disinformation. On the other hand, it is not needed to point out that a generic algorithm for optimizing neural networks could enable people to train models that generate Deepfakes faster.
- The authors should consider possible harms that could arise when the technology is being used as intended and functioning correctly, harms that could arise when the technology is being used as intended but gives incorrect results, and harms following from (intentional or unintentional) misuse of the technology.
- If there are negative societal impacts, the authors could also discuss possible mitigation strategies (e.g., gated release of models, providing defenses in addition to attacks, mechanisms for monitoring misuse, mechanisms to monitor how a system learns from feedback over time, improving the efficiency and accessibility of ML).

## 11. Safeguards

Question: Does the paper describe safeguards that have been put in place for responsible release of data or models that have a high risk for misuse (e.g., pretrained language models, image generators, or scraped datasets)?

Answer: [NA]

Justification: There is no/little risk of misuse for the contents of this paper.

Guidelines:

- The answer NA means that the paper poses no such risks.
- Released models that have a high risk for misuse or dual-use should be released with necessary safeguards to allow for controlled use of the model, for example by requiring that users adhere to usage guidelines or restrictions to access the model or implementing safety filters.
- Datasets that have been scraped from the Internet could pose safety risks. The authors should describe how they avoided releasing unsafe images.
- We recognize that providing effective safeguards is challenging, and many papers do not require this, but we encourage authors to take this into account and make a best faith effort.

## 12. Licenses for existing assets

Question: Are the creators or original owners of assets (e.g., code, data, models), used in the paper, properly credited and are the license and terms of use explicitly mentioned and properly respected?

Answer: [Yes]

Justification: We cite the original study where our real-world dataset comes from multiple times throughout the paper, and the license/terms are respected.

Guidelines:

- The answer NA means that the paper does not use existing assets.
- The authors should cite the original paper that produced the code package or dataset.
- The authors should state which version of the asset is used and, if possible, include a URL.
- The name of the license (e.g., CC-BY 4.0) should be included for each asset.
- For scraped data from a particular source (e.g., website), the copyright and terms of service of that source should be provided.

- If assets are released, the license, copyright information, and terms of use in the package should be provided. For popular datasets, [paperswithcode.com/datasets](https://paperswithcode.com/datasets) has curated licenses for some datasets. Their licensing guide can help determine the license of a dataset.
- For existing datasets that are re-packaged, both the original license and the license of the derived asset (if it has changed) should be provided.
- If this information is not available online, the authors are encouraged to reach out to the asset's creators.

### 13. New assets

Question: Are new assets introduced in the paper well documented and is the documentation provided alongside the assets?

Answer: [NA]

Justification: This paper does not release new assets.

Guidelines:

- The answer NA means that the paper does not release new assets.
- Researchers should communicate the details of the dataset/code/model as part of their submissions via structured templates. This includes details about training, license, limitations, etc.
- The paper should discuss whether and how consent was obtained from people whose asset is used.
- At submission time, remember to anonymize your assets (if applicable). You can either create an anonymized URL or include an anonymized zip file.

### 14. Crowdsourcing and research with human subjects

Question: For crowdsourcing experiments and research with human subjects, does the paper include the full text of instructions given to participants and screenshots, if applicable, as well as details about compensation (if any)?

Answer: [Yes]

Justification: We provide the exact questions used by Offer-Westort et al. [20] in Appendix C, referencing the previous work.

Guidelines:

- The answer NA means that the paper does not involve crowdsourcing nor research with human subjects.
- Including this information in the supplemental material is fine, but if the main contribution of the paper involves human subjects, then as much detail as possible should be included in the main paper.
- According to the NeurIPS Code of Ethics, workers involved in data collection, curation, or other labor should be paid at least the minimum wage in the country of the data collector.

### 15. Institutional review board (IRB) approvals or equivalent for research with human subjects

Question: Does the paper describe potential risks incurred by study participants, whether such risks were disclosed to the subjects, and whether Institutional Review Board (IRB) approvals (or an equivalent approval/review based on the requirements of your country or institution) were obtained?

Answer: [NA]

Justification: The paper does not involve study participants directly. All data used from crowdsourcing was collected by a previous paper (Offer-Westort et al. [20]), and proper citations were provided.

Guidelines:

- The answer NA means that the paper does not involve crowdsourcing nor research with human subjects.

- 1062 • Depending on the country in which research is conducted, IRB approval (or equivalent)  
1063 may be required for any human subjects research. If you obtained IRB approval, you  
1064 should clearly state this in the paper.
- 1065 • We recognize that the procedures for this may vary significantly between institutions  
1066 and locations, and we expect authors to adhere to the NeurIPS Code of Ethics and the  
1067 guidelines for their institution.
- 1068 • For initial submissions, do not include any information that would break anonymity (if  
1069 applicable), such as the institution conducting the review.

#### 1070 16. **Declaration of LLM usage**

1071 Question: Does the paper describe the usage of LLMs if it is an important, original, or  
1072 non-standard component of the core methods in this research? Note that if the LLM is used  
1073 only for writing, editing, or formatting purposes and does not impact the core methodology,  
1074 scientific rigorousness, or originality of the research, declaration is not required.

1075 Answer: [NA]

1076 Justification: LLMs were only used for editing/summarizing within this manuscript and  
1077 formatting of the figures in Python.

1078 Guidelines:

- 1079 • The answer NA means that the core method development in this research does not  
1080 involve LLMs as any important, original, or non-standard components.
- 1081 • Please refer to our LLM policy (<https://neurips.cc/Conferences/2025/LLM>)  
1082 for what should or should not be described.
