# Supplementary material
Source: ML conference proceedings conference paper supplement (https://openreview.net/forum?id=lGUzCAdYoq)

Coverage (Nominal 90%)

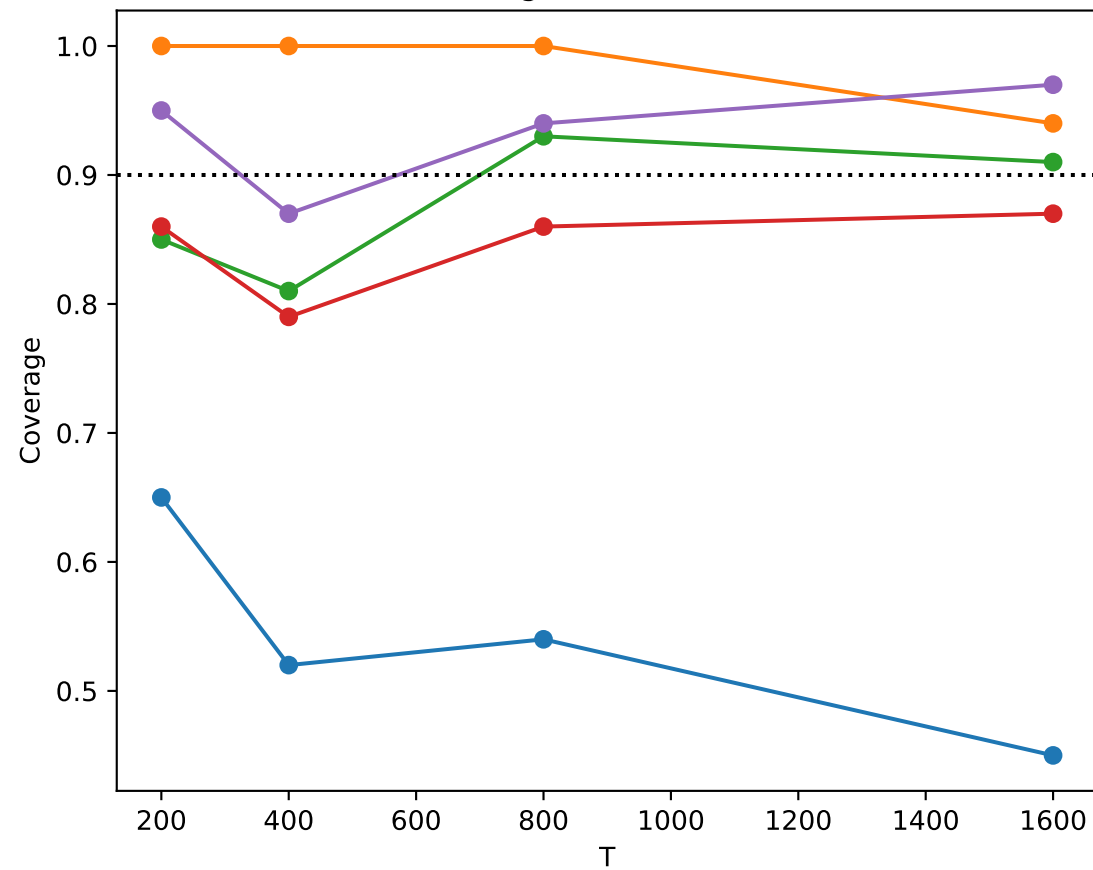

Average CI Width

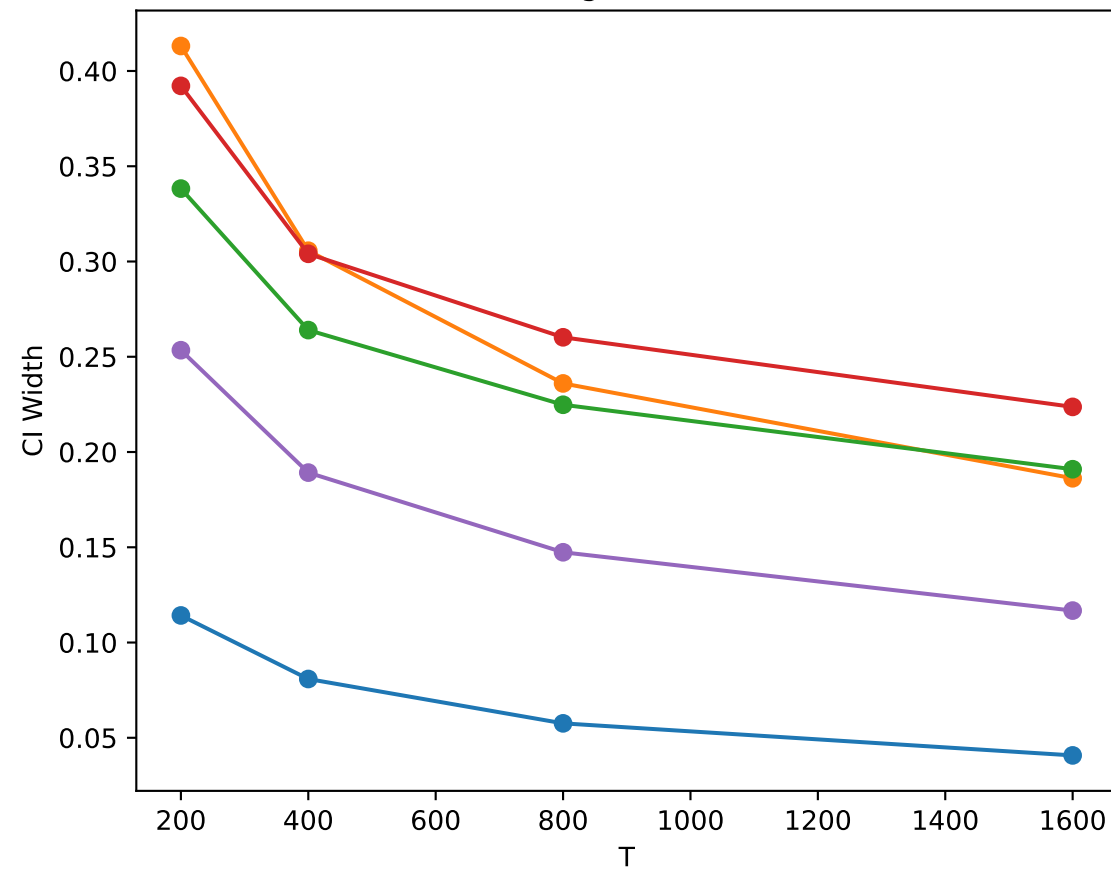

RMSE

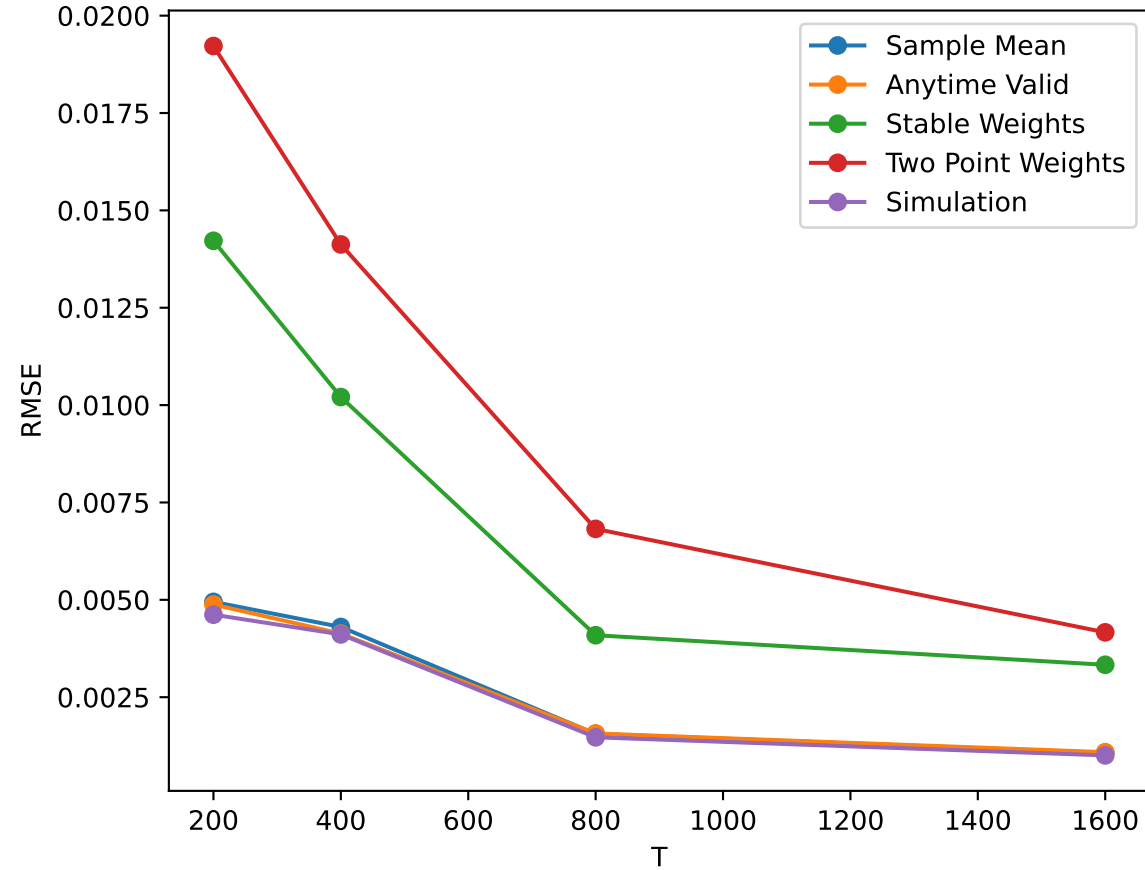

Supplement: supplementary_material [file plot.pdf › simulation_inference/plot.pdf]
